# Supplementary material
Source: publisher figshare collection journal article supplement (https://tandf.figshare.com/ndownloader/files/38311111)
Supplement: Supplementary file 1 [file 38311111]

**Synthesis of new benzimidazole derivatives containing 1,3,4-thiadiazole: Their in vitro antimicrobial, in silico molecular docking and molecular dynamic simulations studies**

**Ulviye Acar Çevik1*, Ayşen Işık2, Asaf Evrim Evren1,3, Özge Kapusız4, Ülküye Dudu Gül5, Yusuf Özkay1, Zafer Asım Kaplancıklı1**

1 Department of Pharmaceutical Chemistry, Faculty of Pharmacy, Anadolu University, Eskişehir 26470, Turkey.

2 Department of Biochemistry, Faculty of Science, Selçuk University, Konya, Turkey.

3 Department of Pharmacy Services, Bilecik Şeyh Edebali University, Vocational School of Health Services, 11000, Bilecik, Turkey.

4 Bilecik Şeyh Edebali University, Graduate School of Educational Sciences, Bioengineering, Bilecik, Turkey.

5 Department of Bioengineering, Faculty of Engineering, Bilecik Seyh Edebali University, Bilecik, Turkey

* Corresponding Author. E-mail: uacar@anadolu.edu.tr; Tel. +90-222-335-0580/3775

Address: Anadolu University, Faculty of Pharmacy, Department of Pharmaceutical Chemistry, 26470, Eskişehir, Turkey.


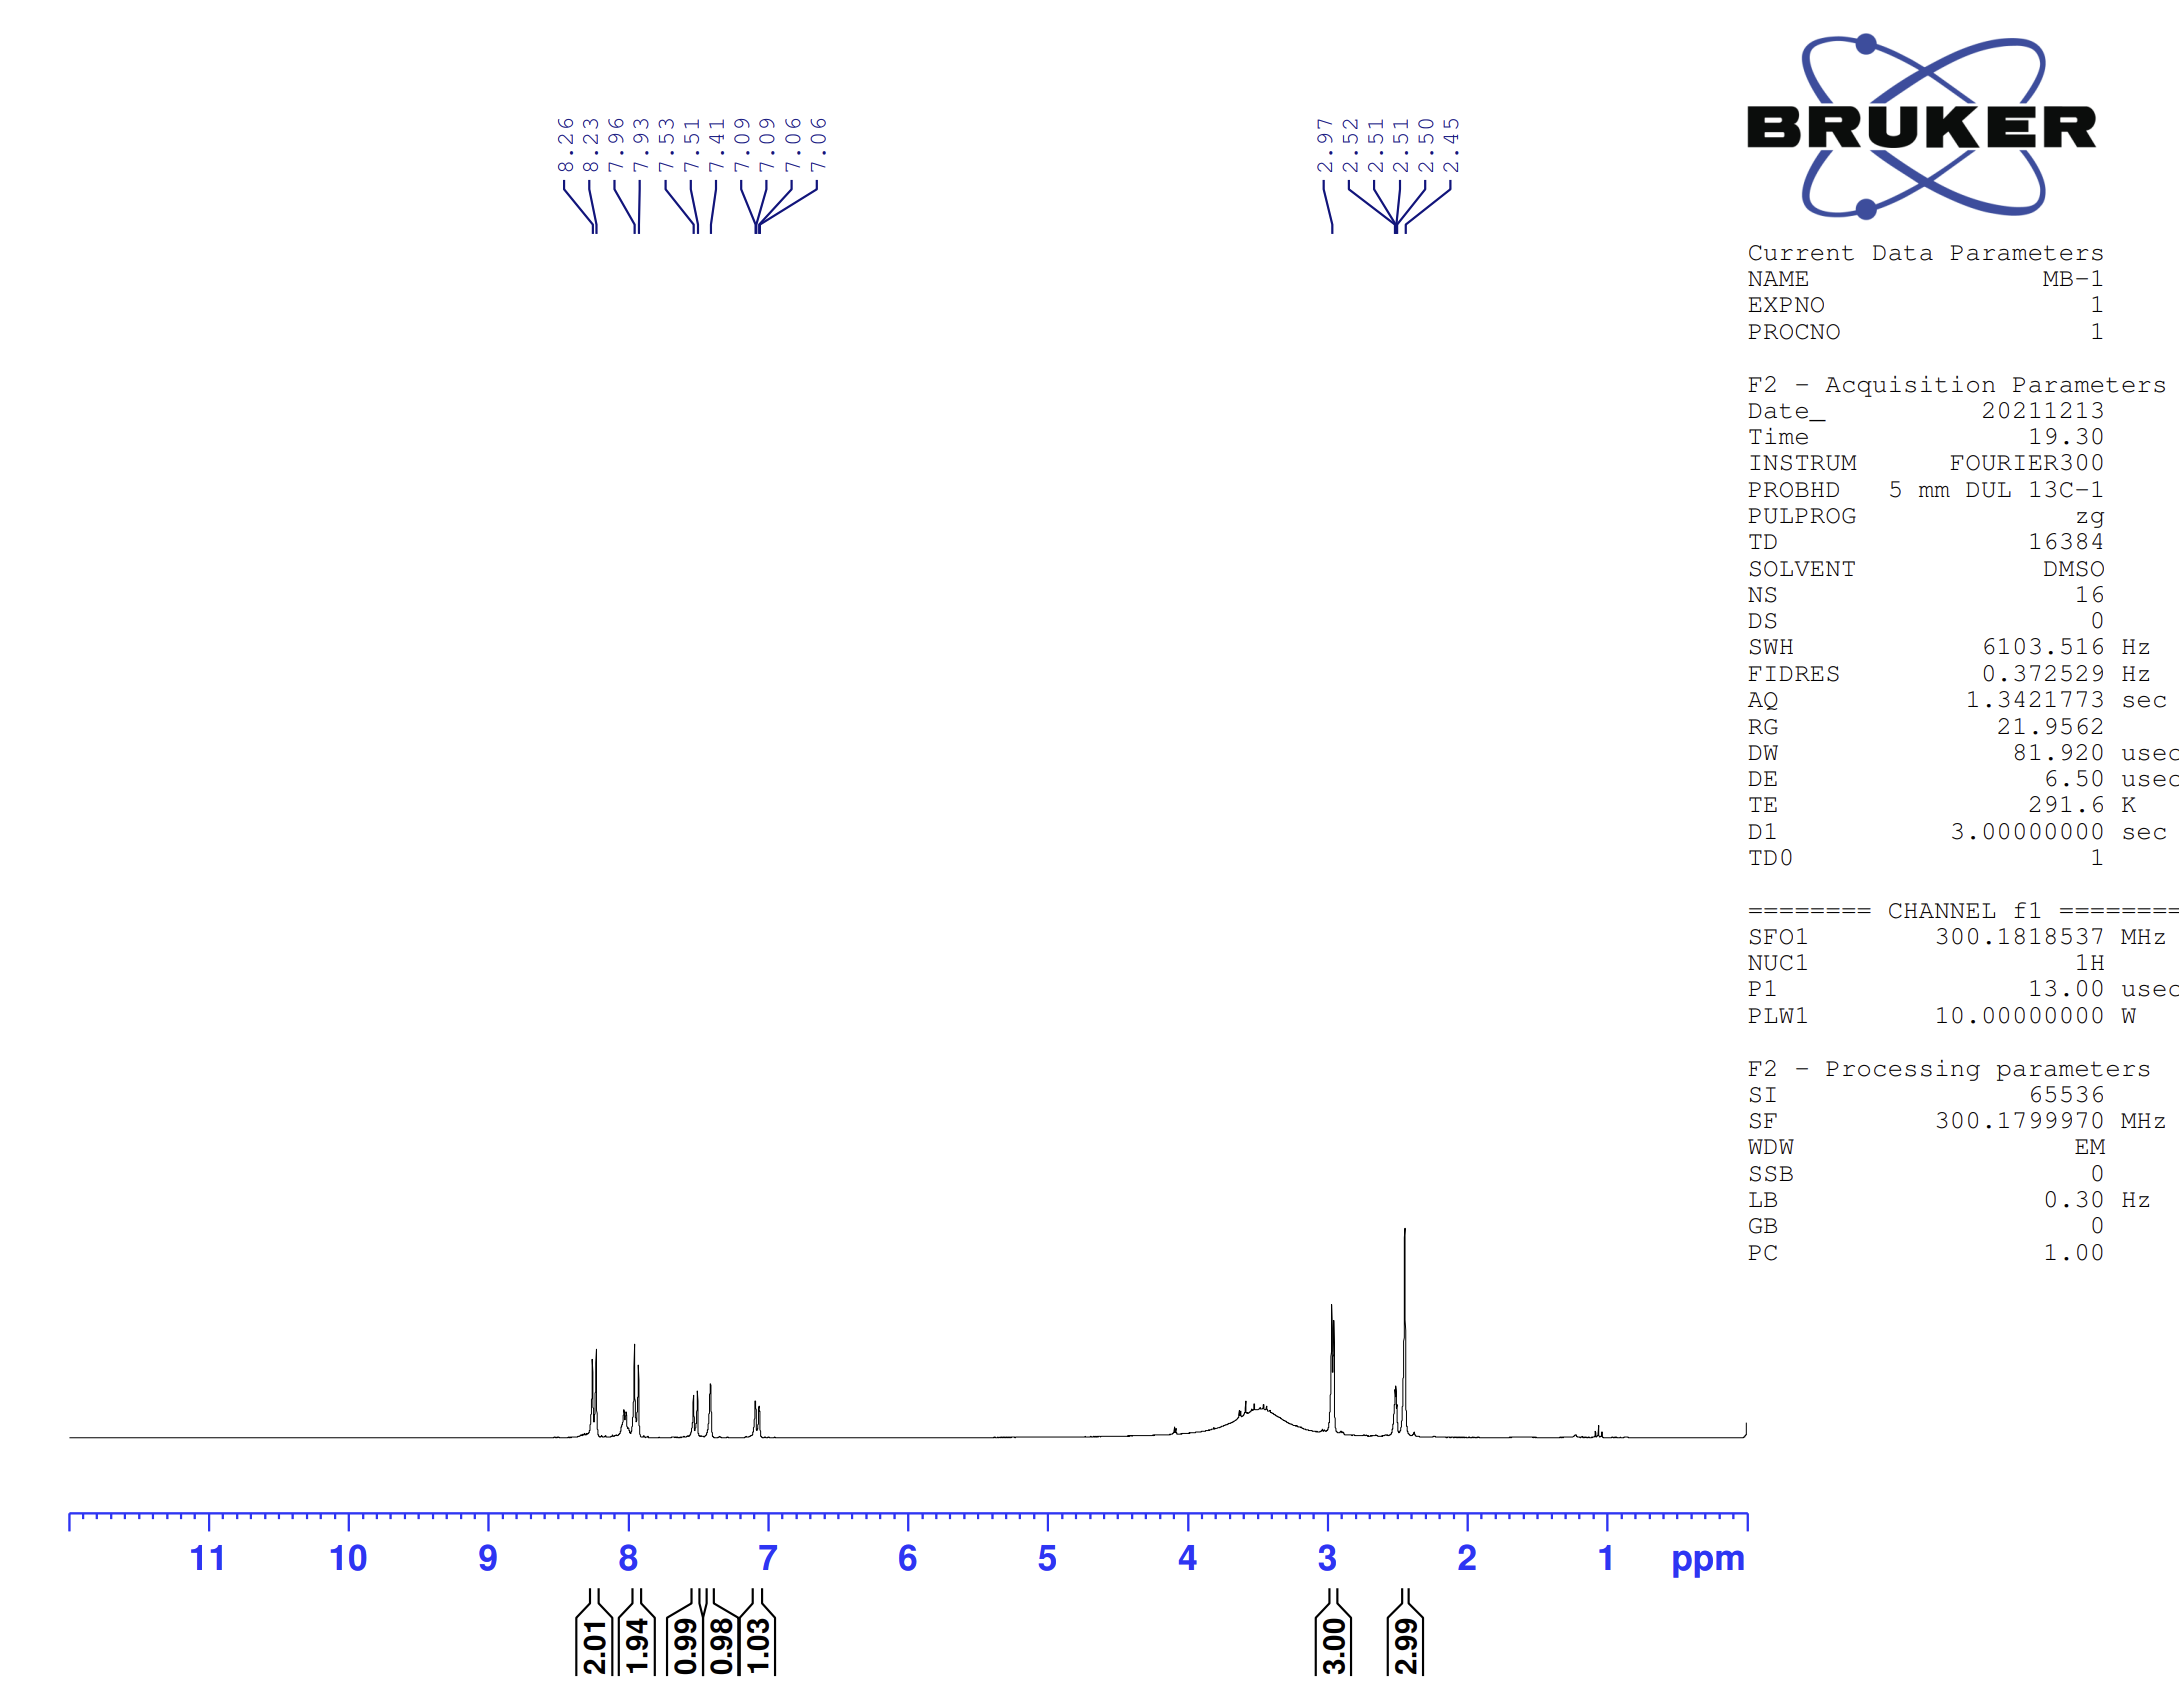
**Figure 1.** 1H-NMR spectrum of compound **4a**


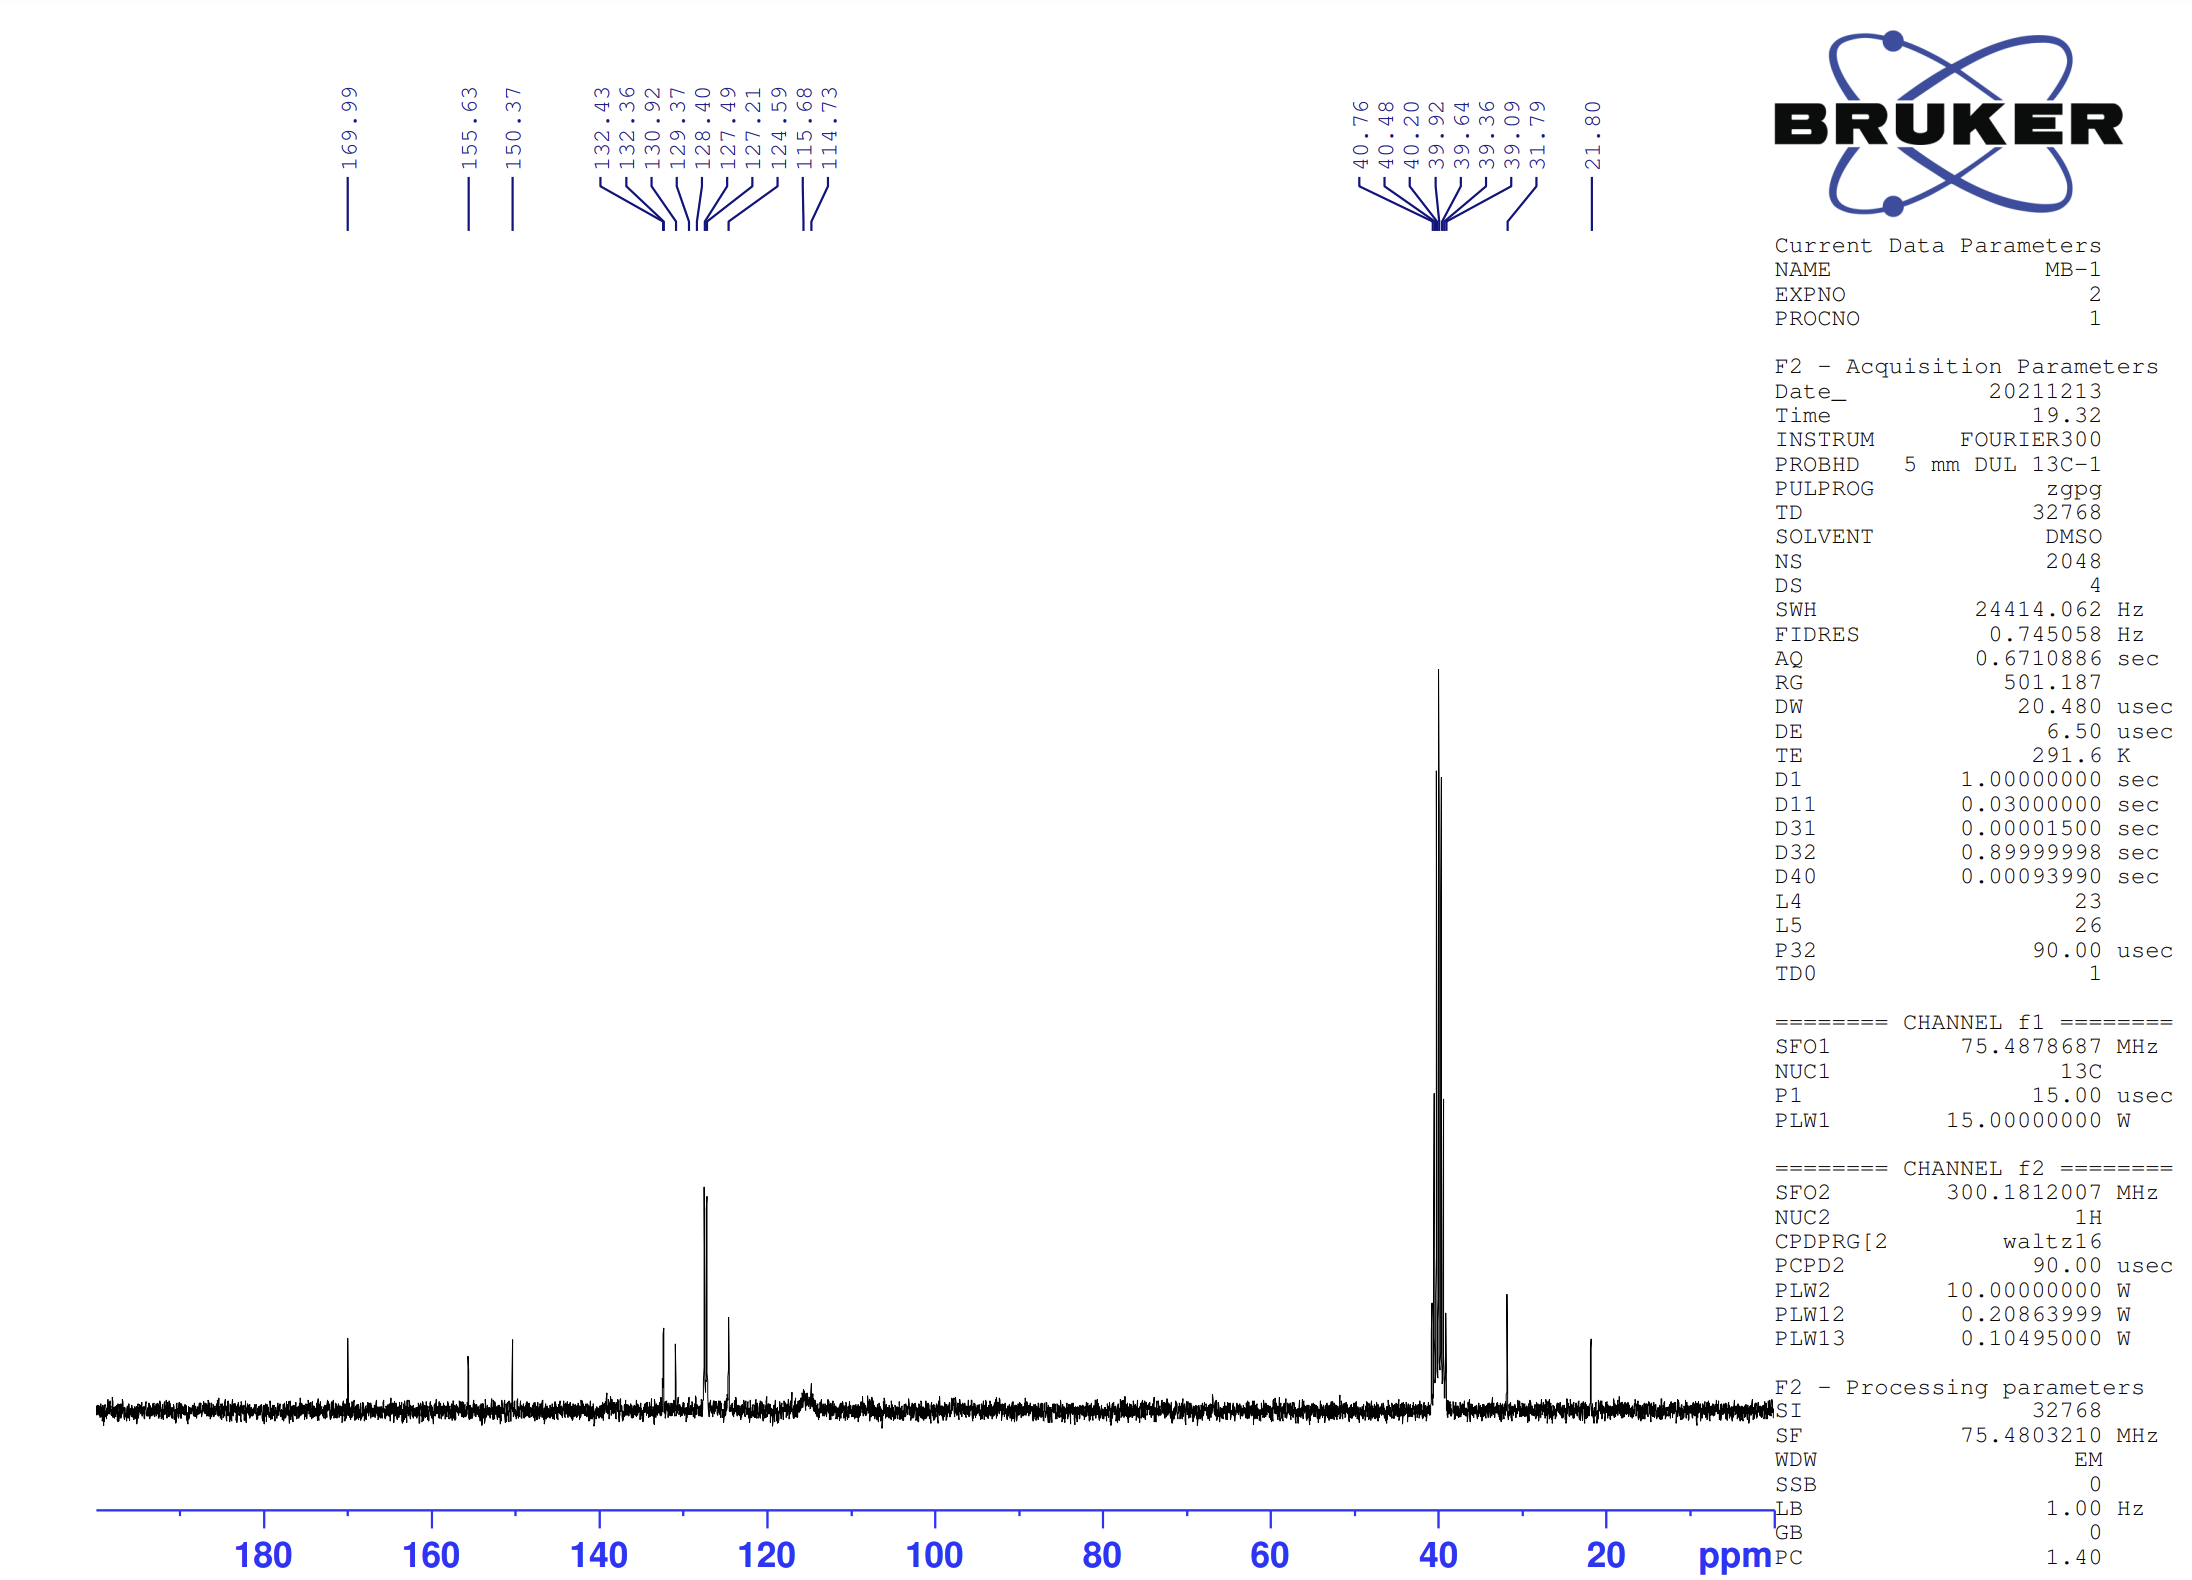


**Figure 2.** 13C-NMR spectrum of compound **4a**


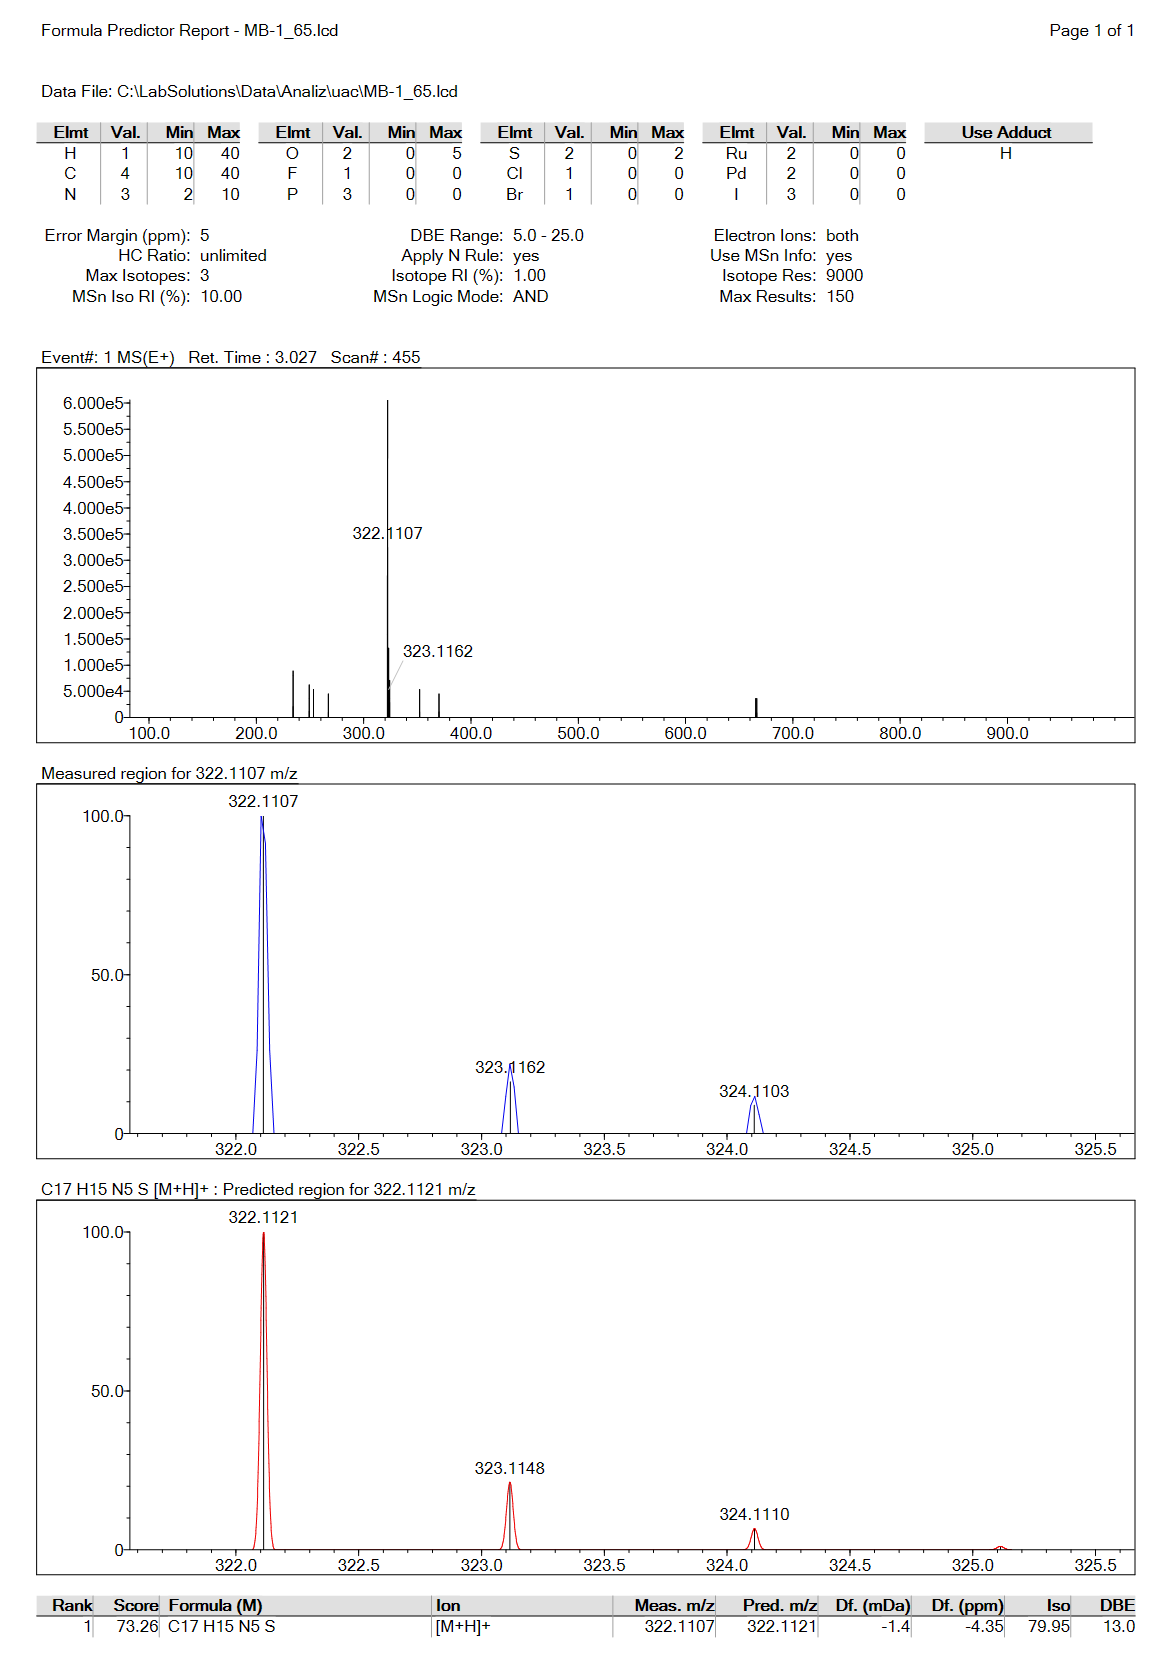
**Figure 3.** Mass spectrum of compound **4a**


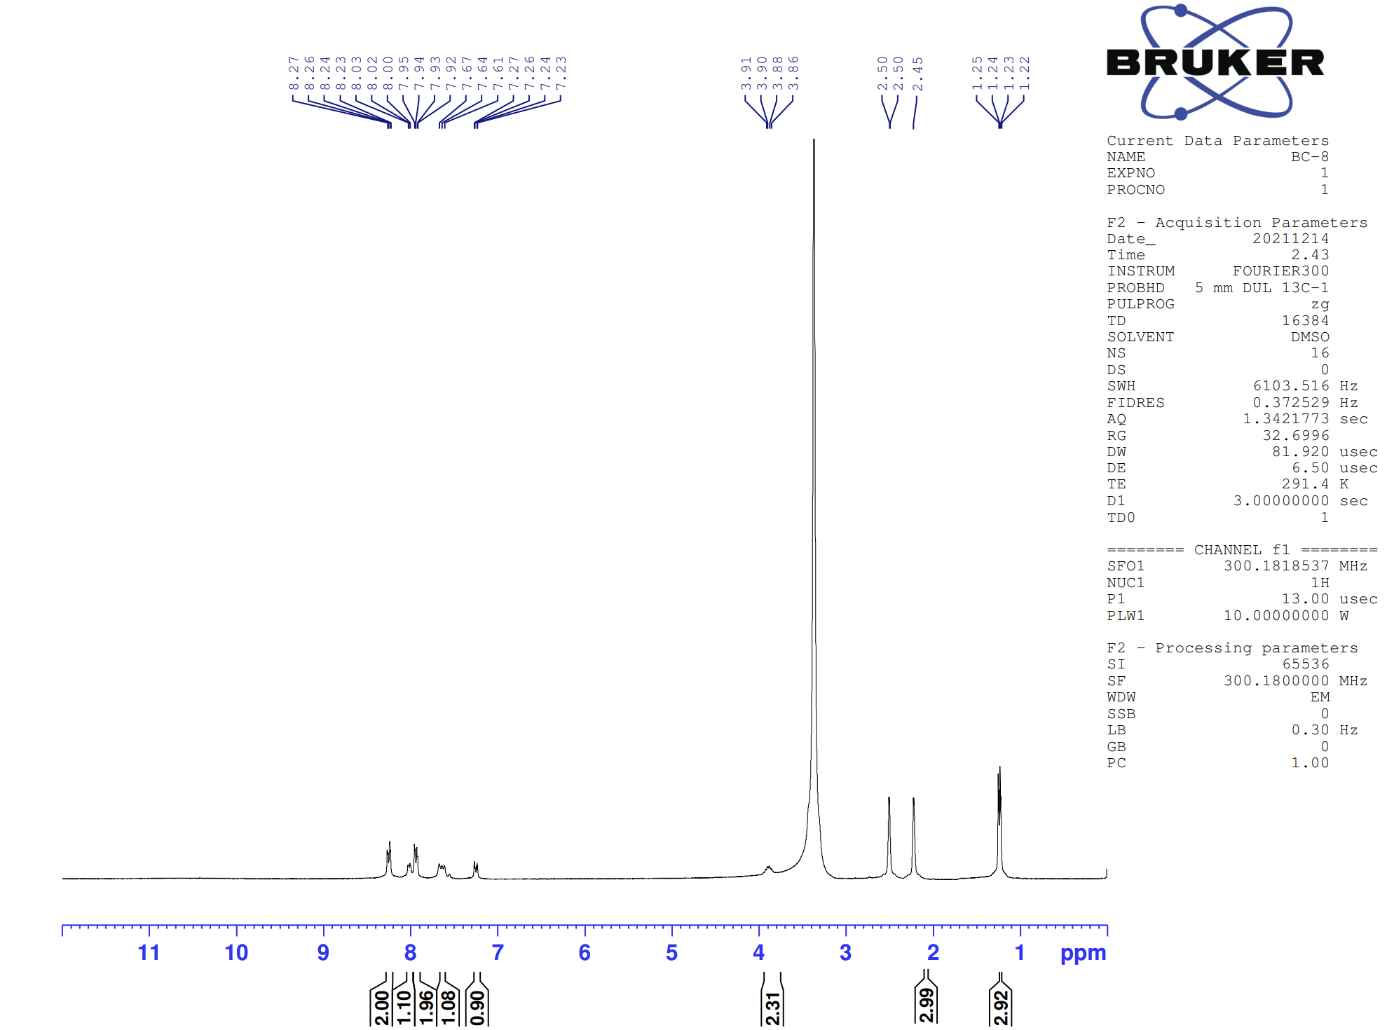


**Figure 4.** 1H-NMR spectrum of compound **4b**

**
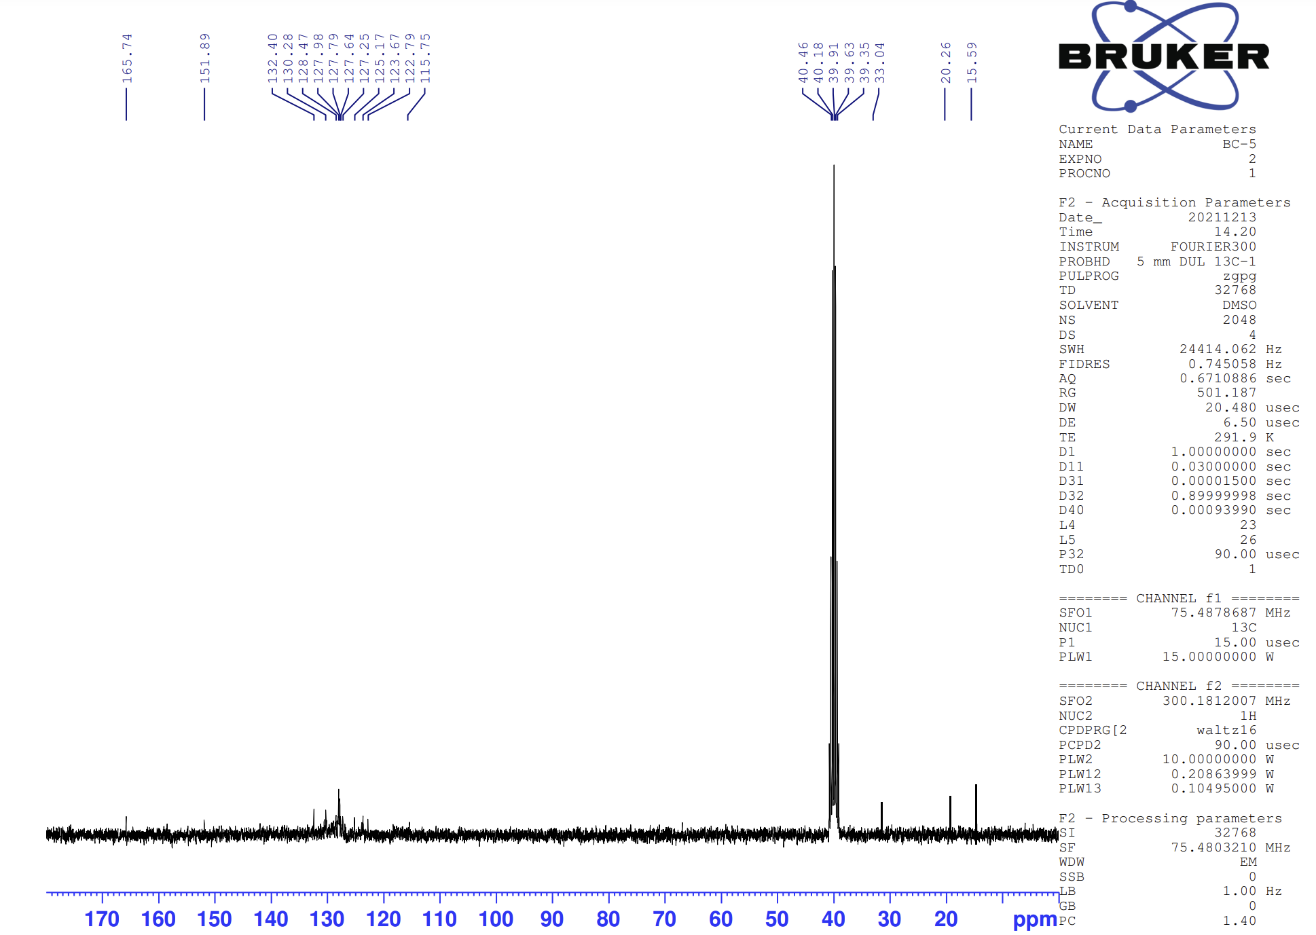
**

**Figure 5.** 13C-NMR spectrum of compound **4b**


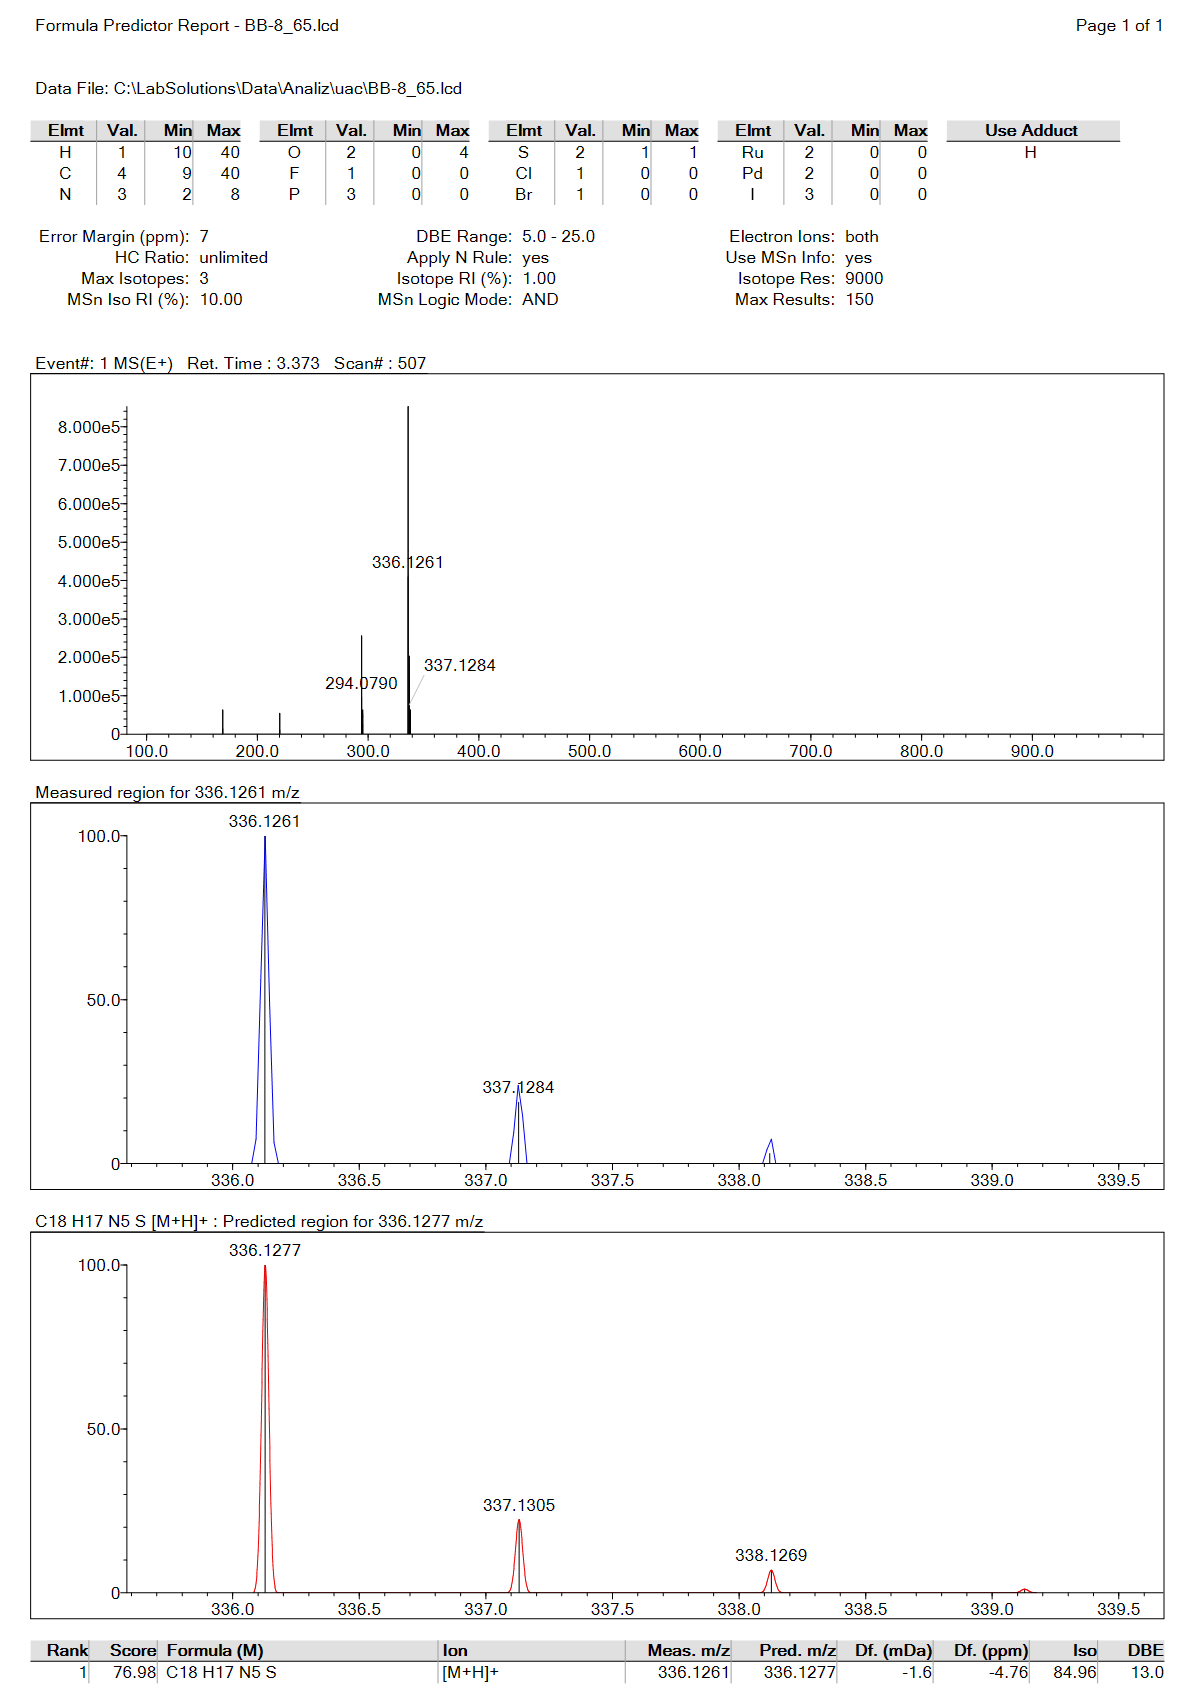
**Figure 6.** Mass spectrum of compound **4b**


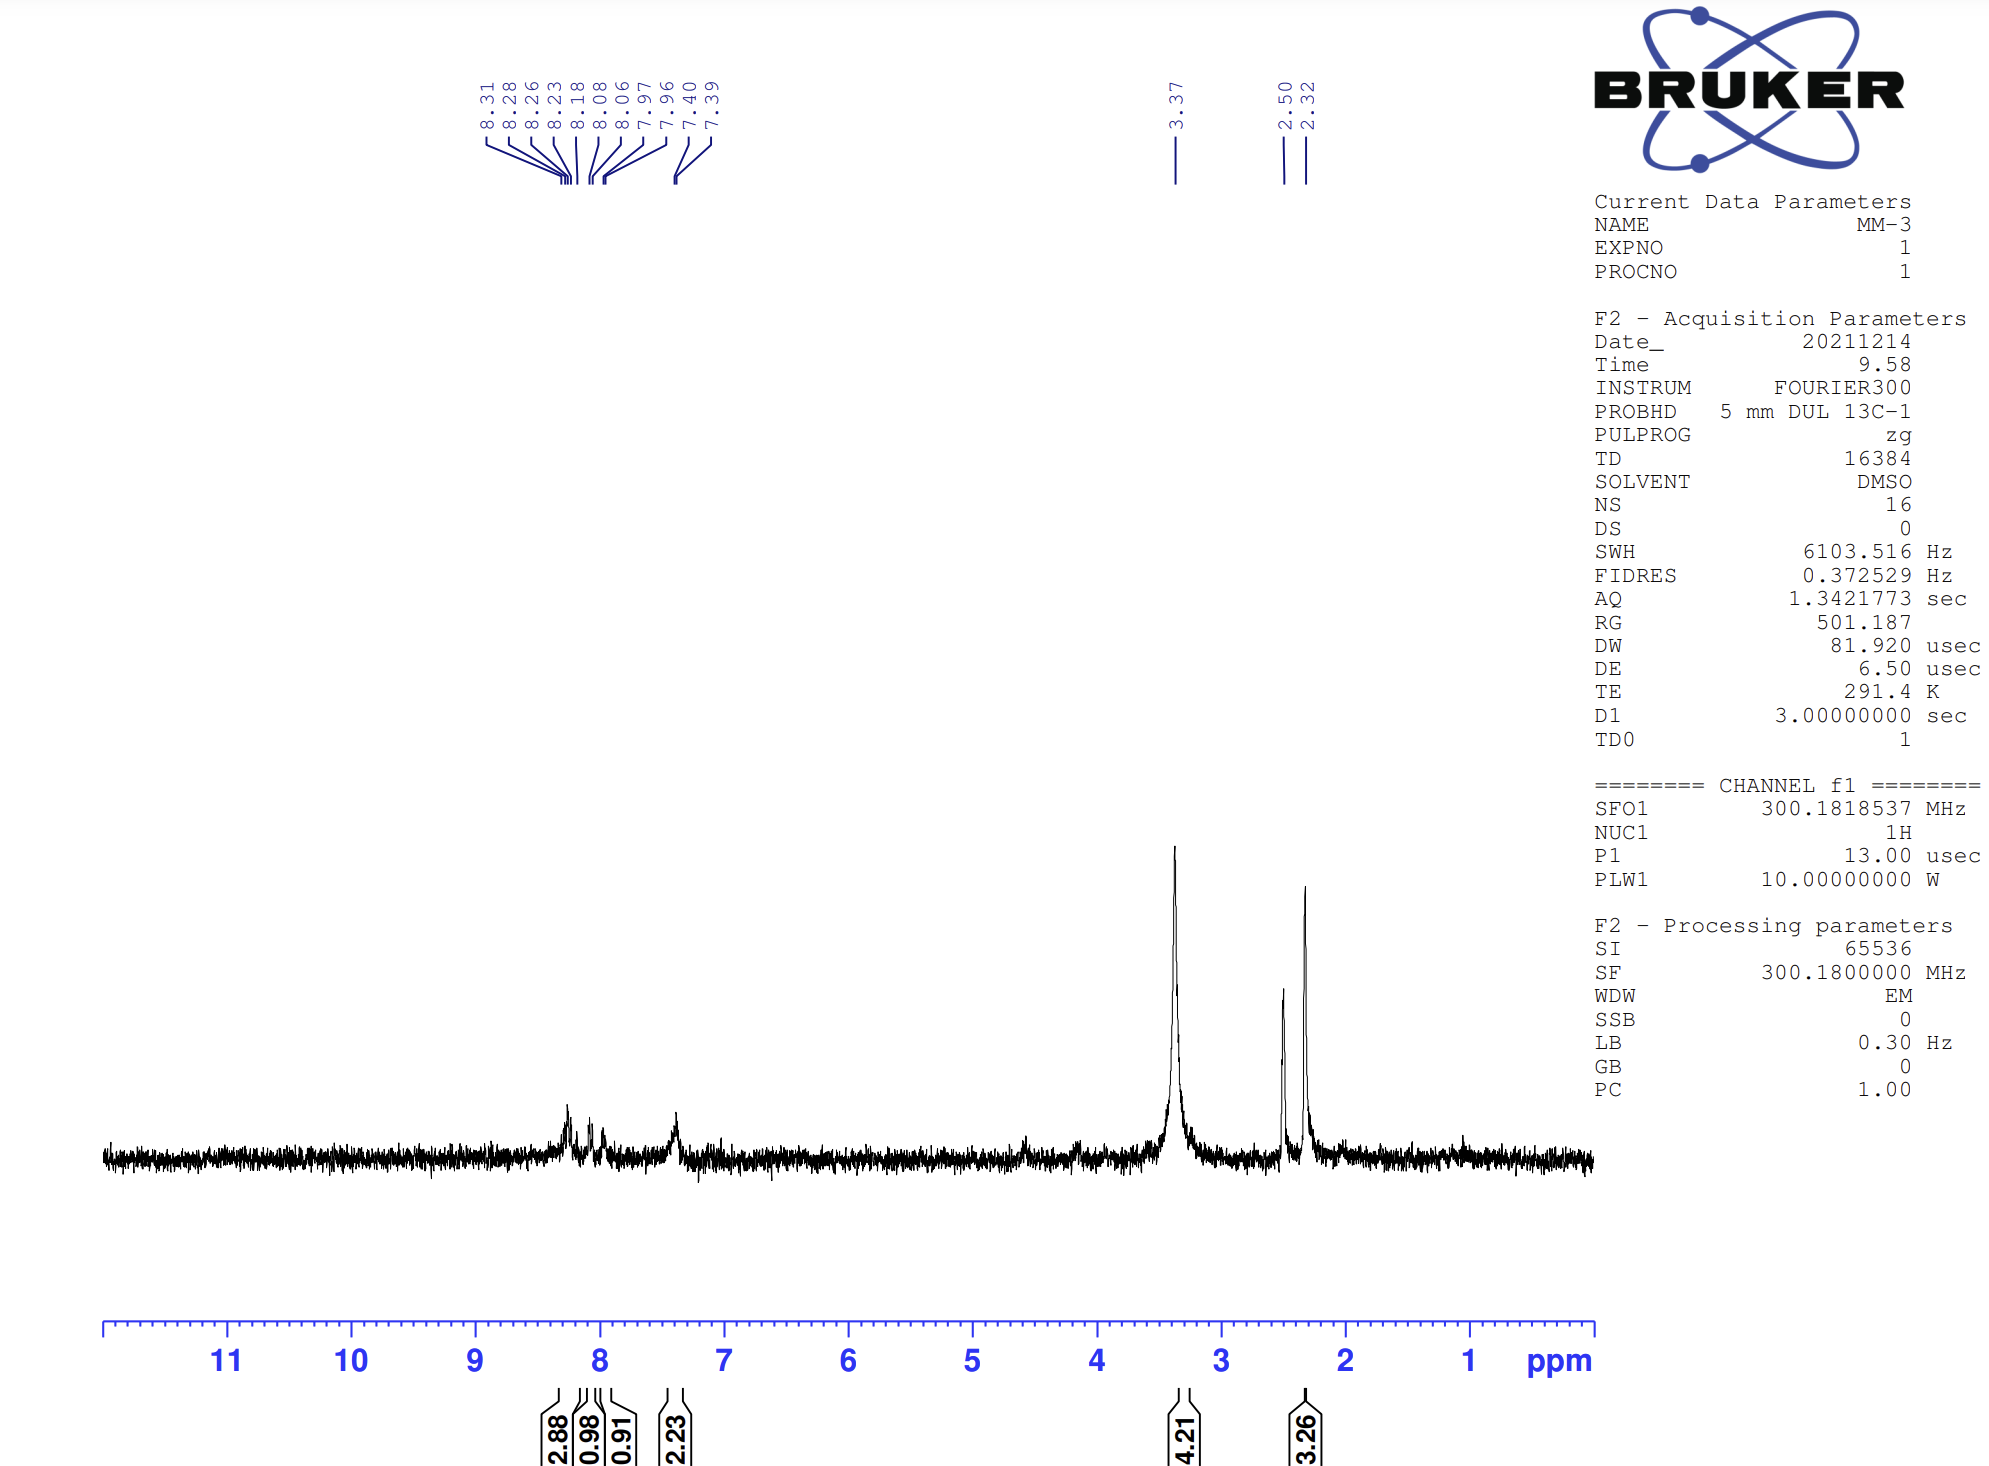


**Figure 7.** 1H-NMR spectrum of compound **4c**

**
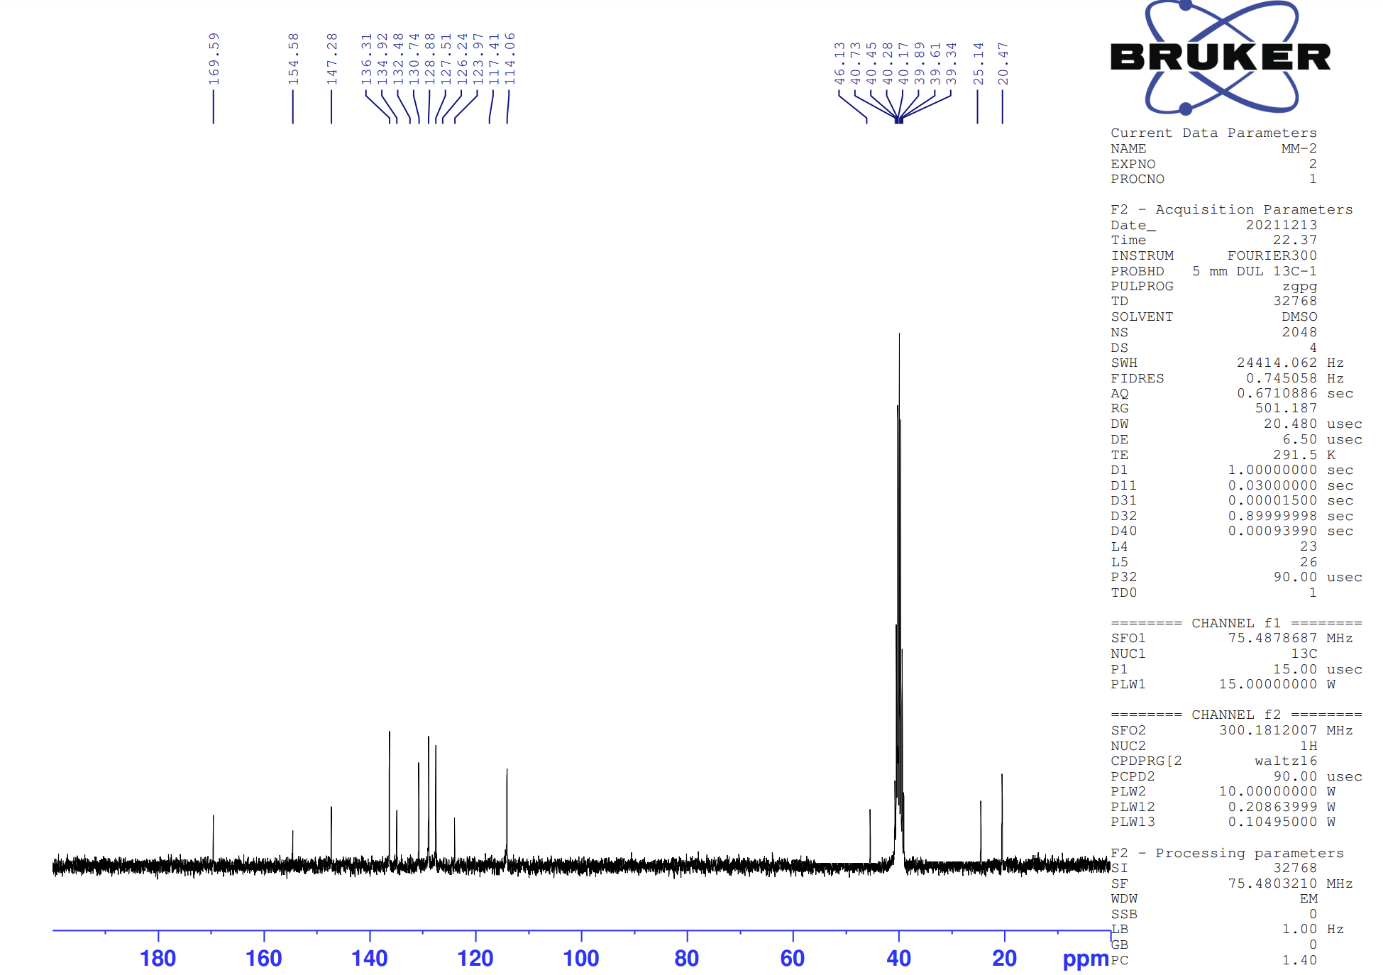
**

**Figure 8.** 13C-NMR spectrum of compound **4c**


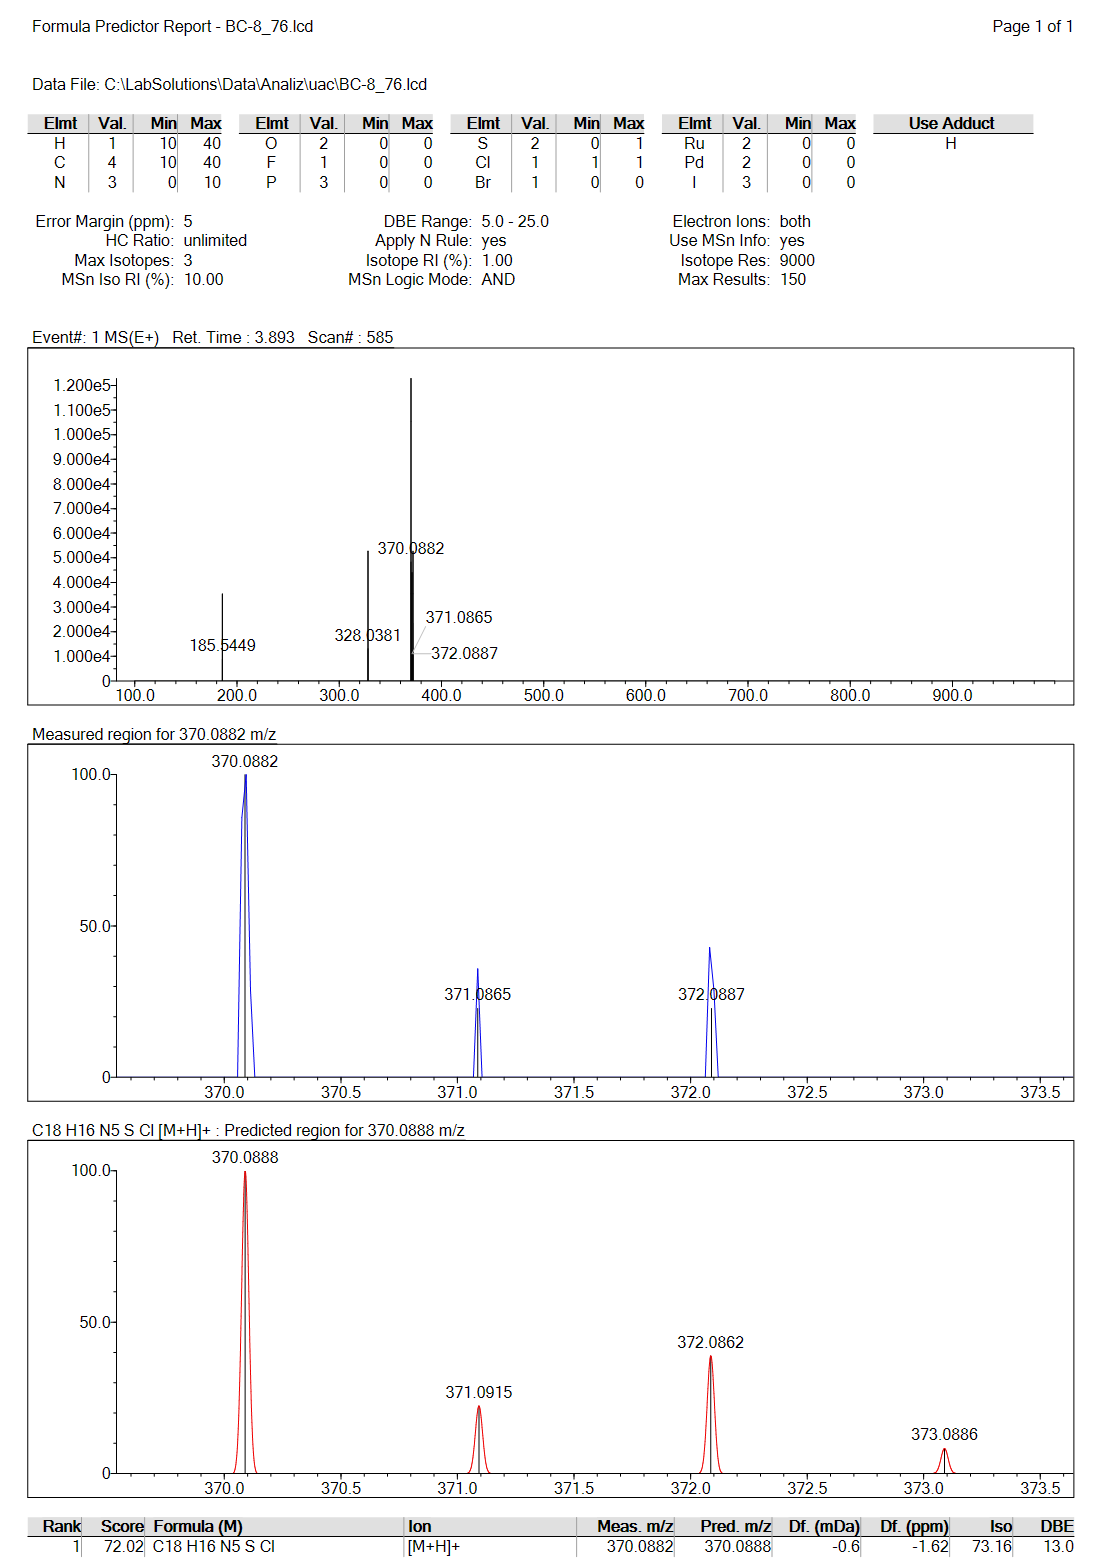


**Figure 9.** Mass spectrum of compound **4c**


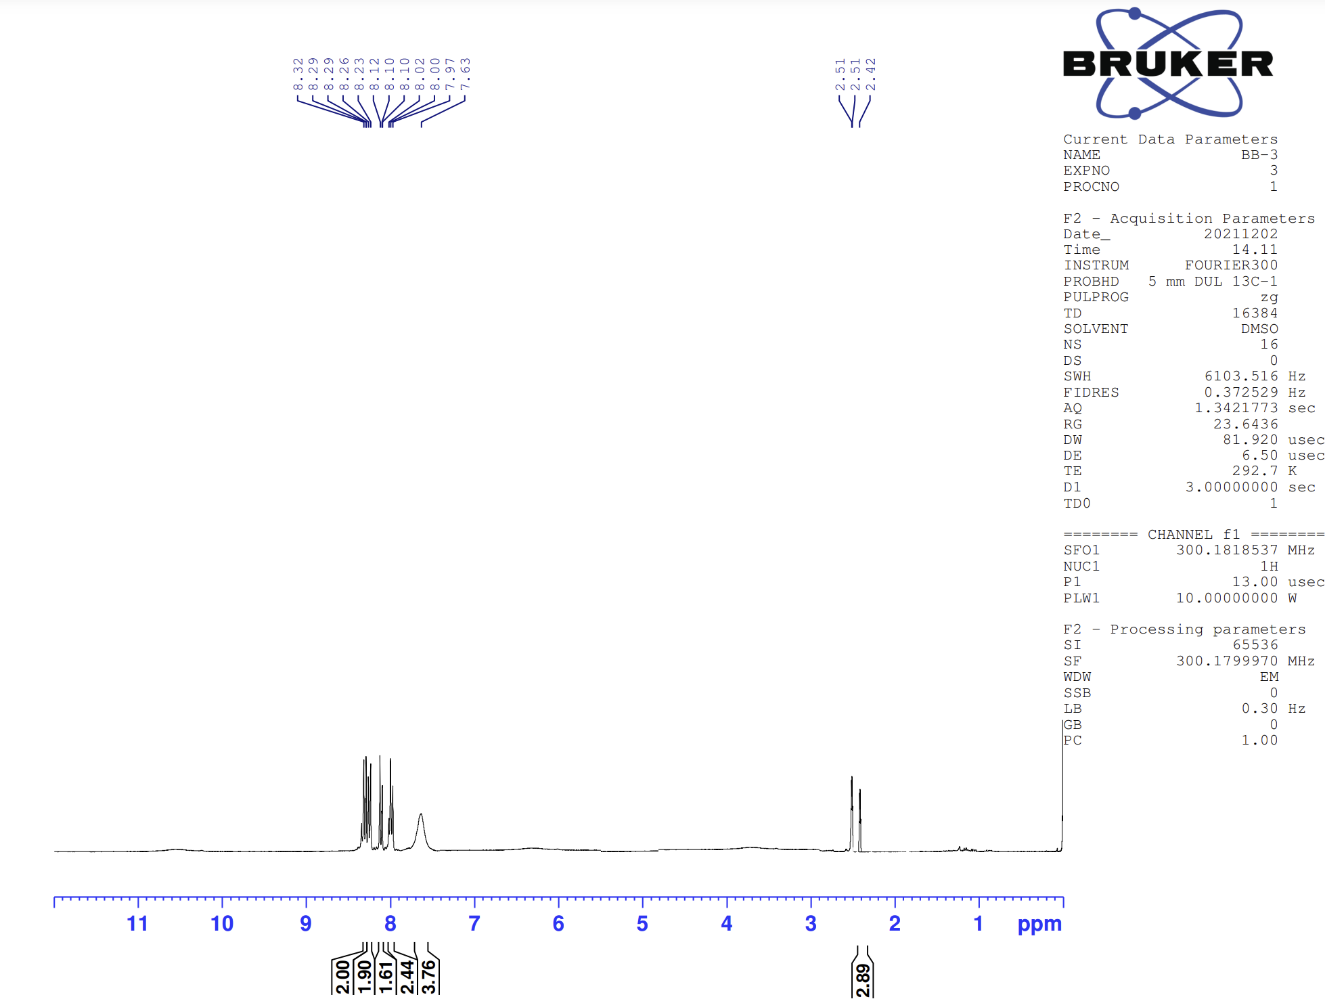


**Figure 10.** 1H-NMR spectrum of compound **4d**

**
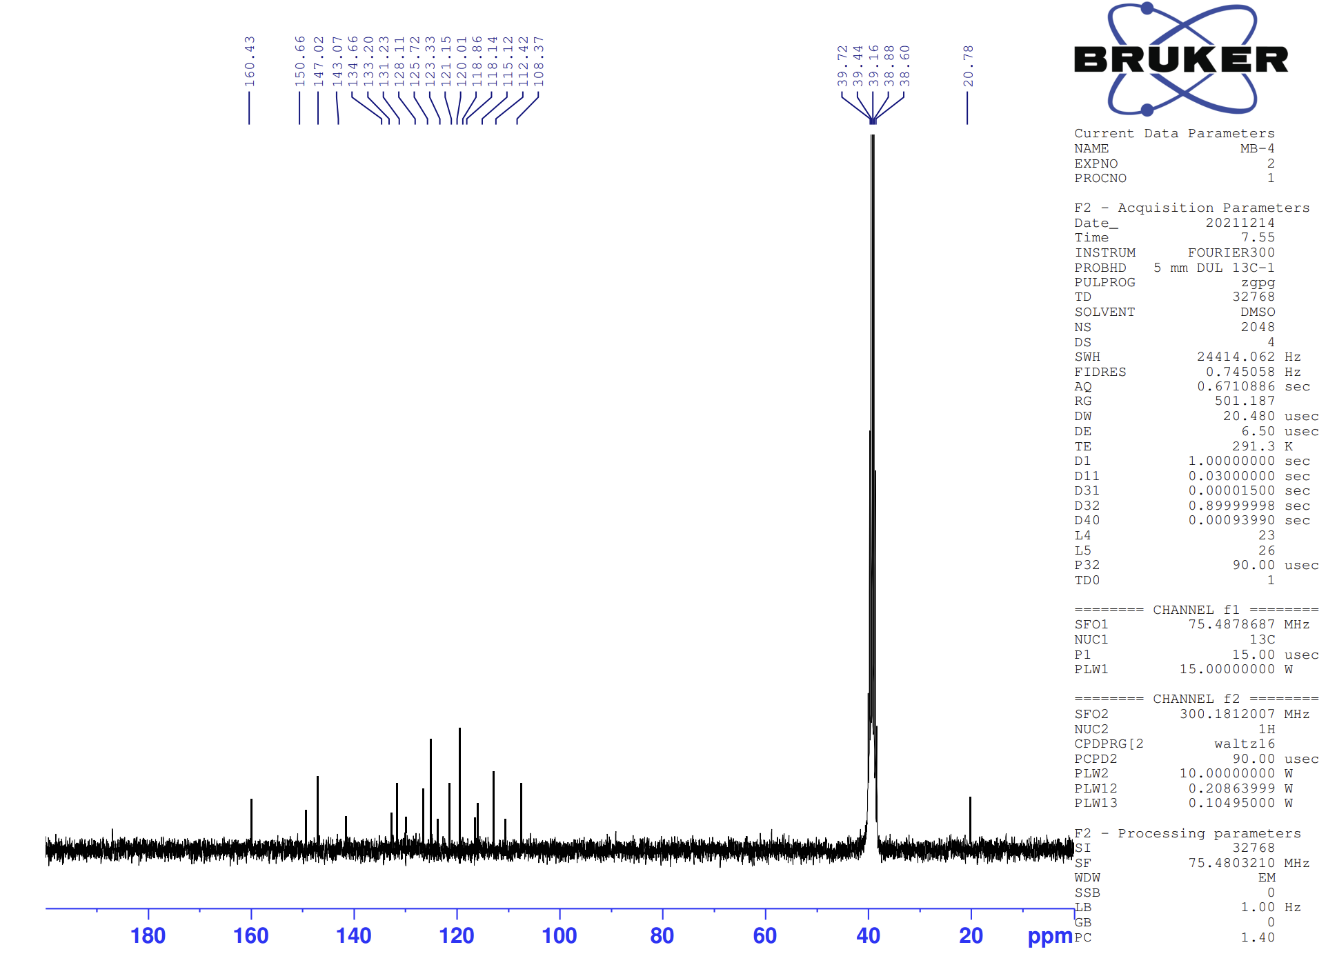
**

**Figure 11.** 13C-NMR spectrum of compound **4d**


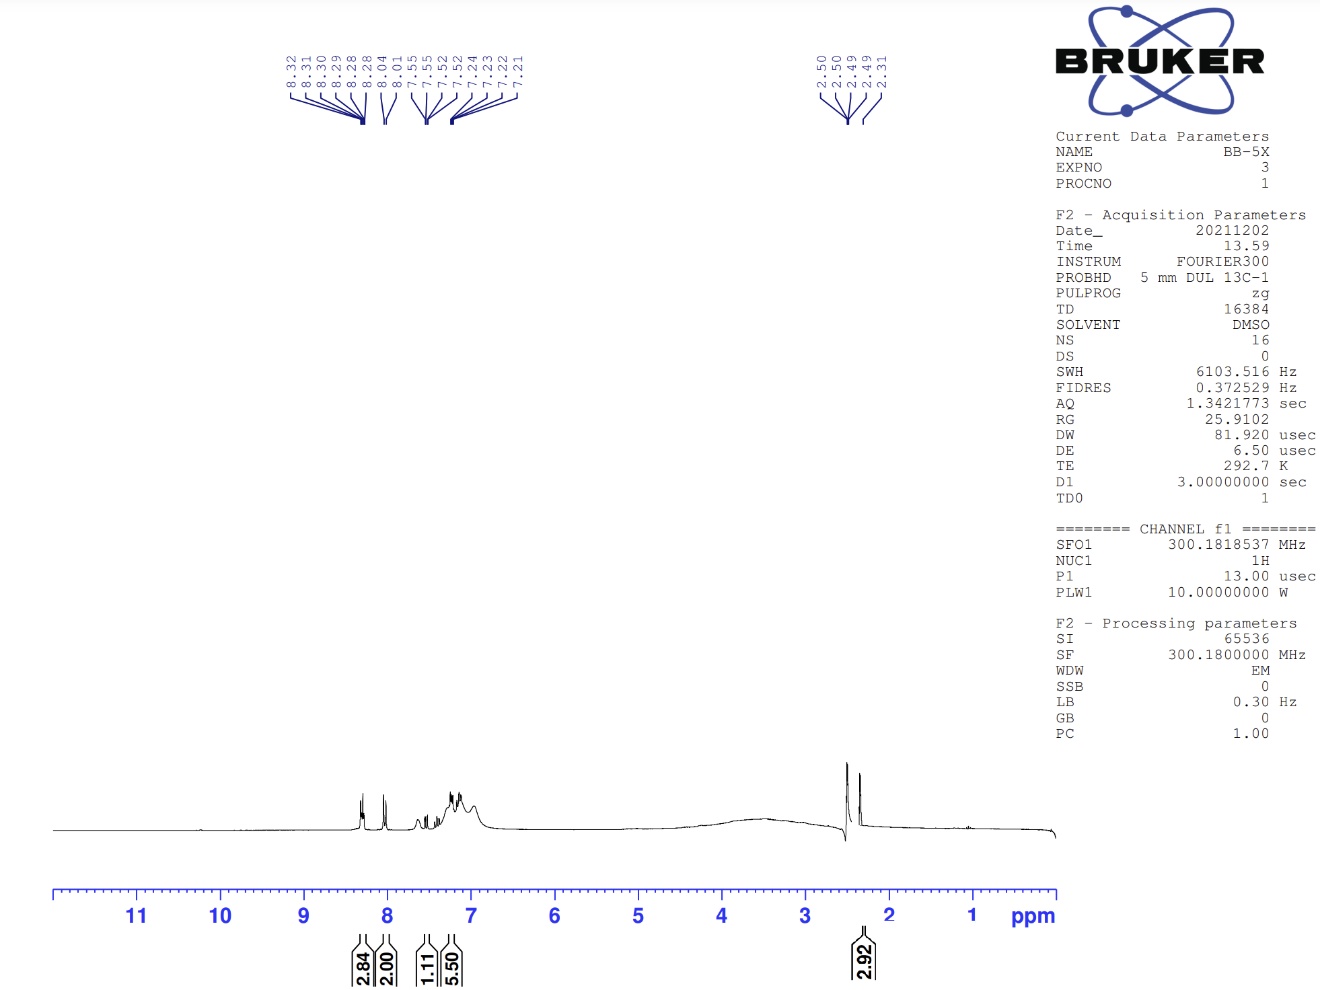


**Figure 13.** 1H-NMR spectrum of compound **4e**

**
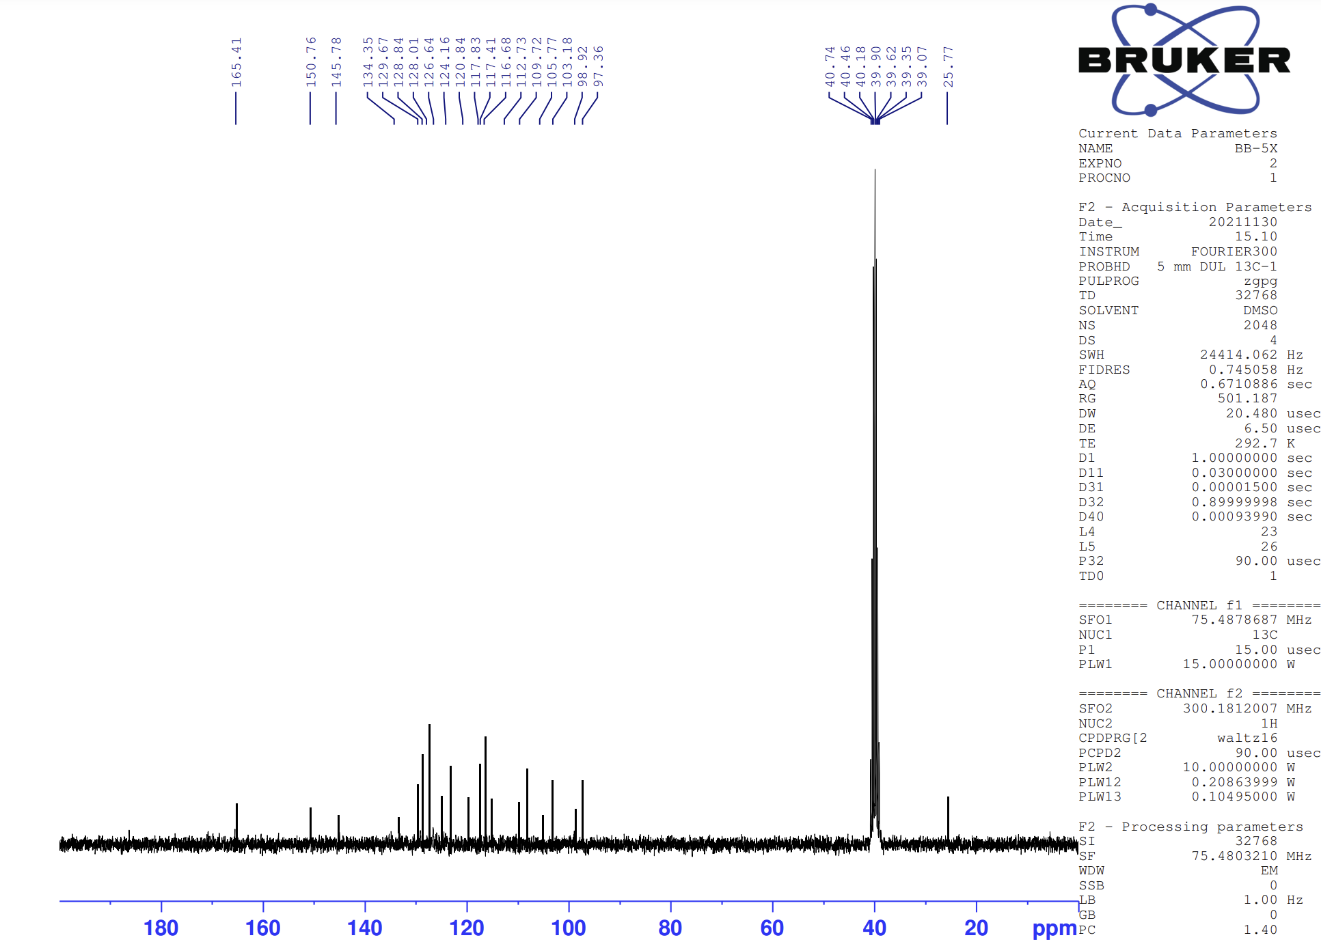
**

**Figure 14.** 13C-NMR spectrum of compound **4e**


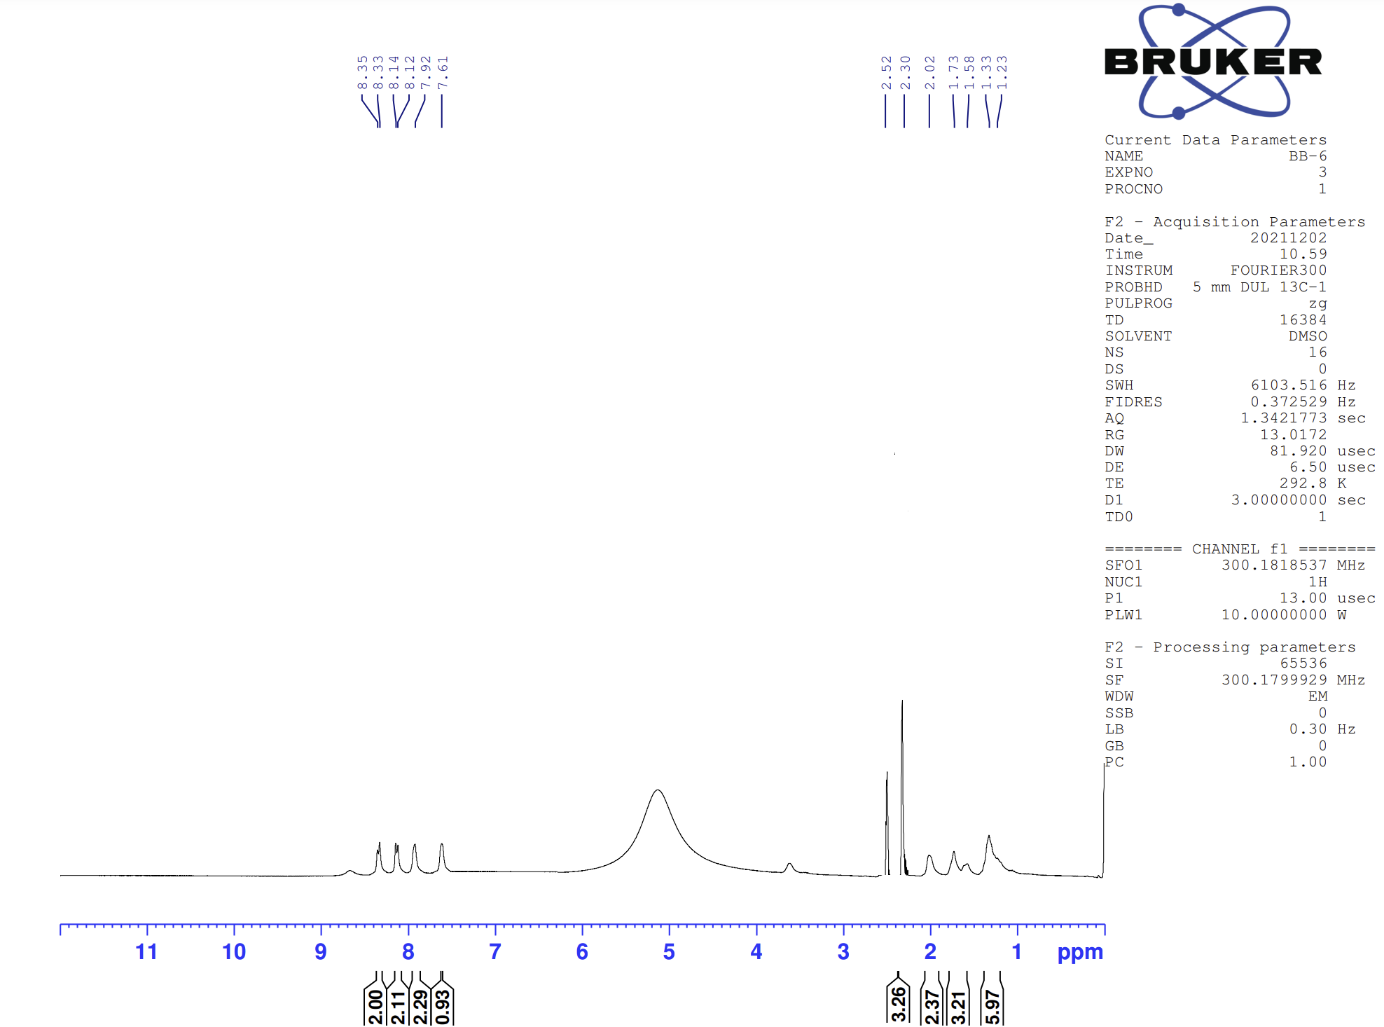


**Figure 15.** 1H-NMR spectrum of compound **4f**

**
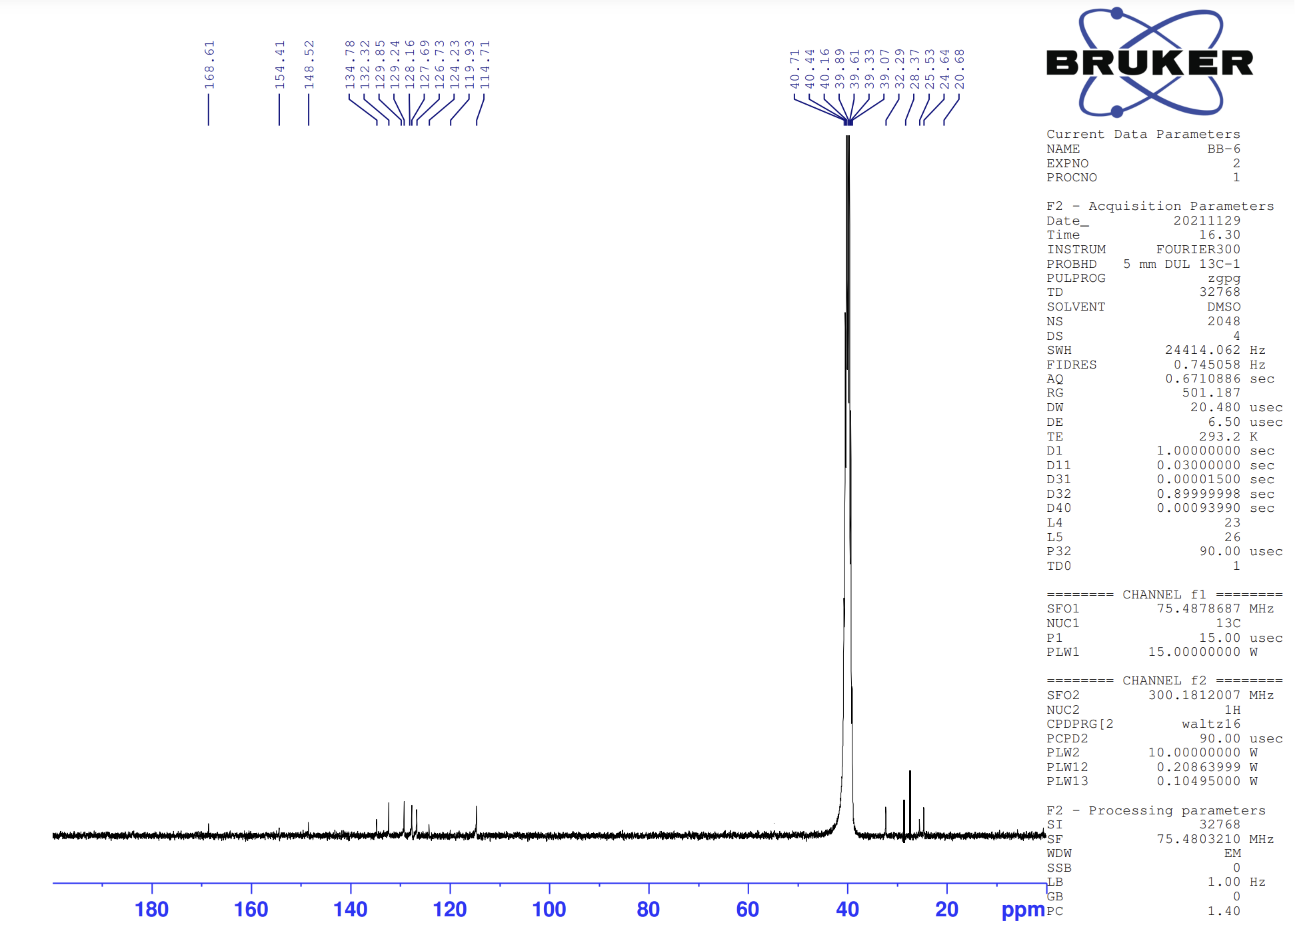
**

**Figure 17.** 13C-NMR spectrum of compound **4f**


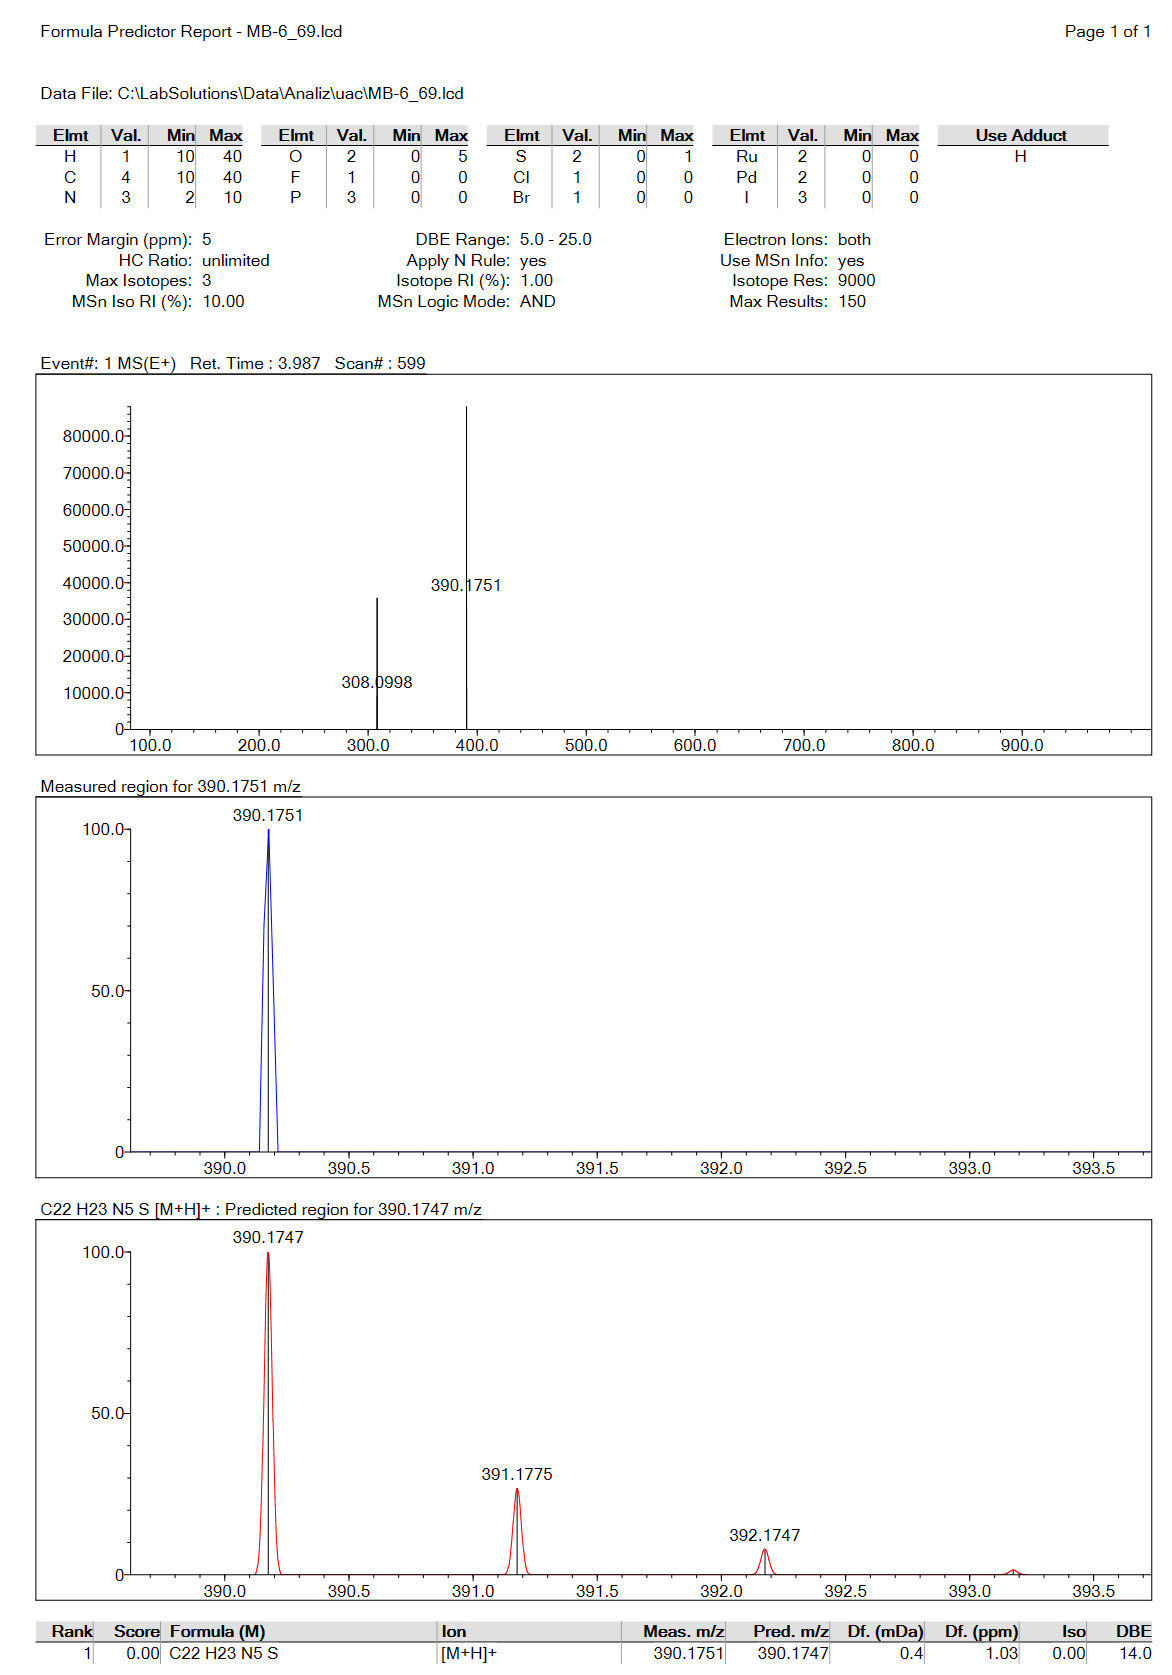


**Figure 18.** Mass spectrum of compound **4f**


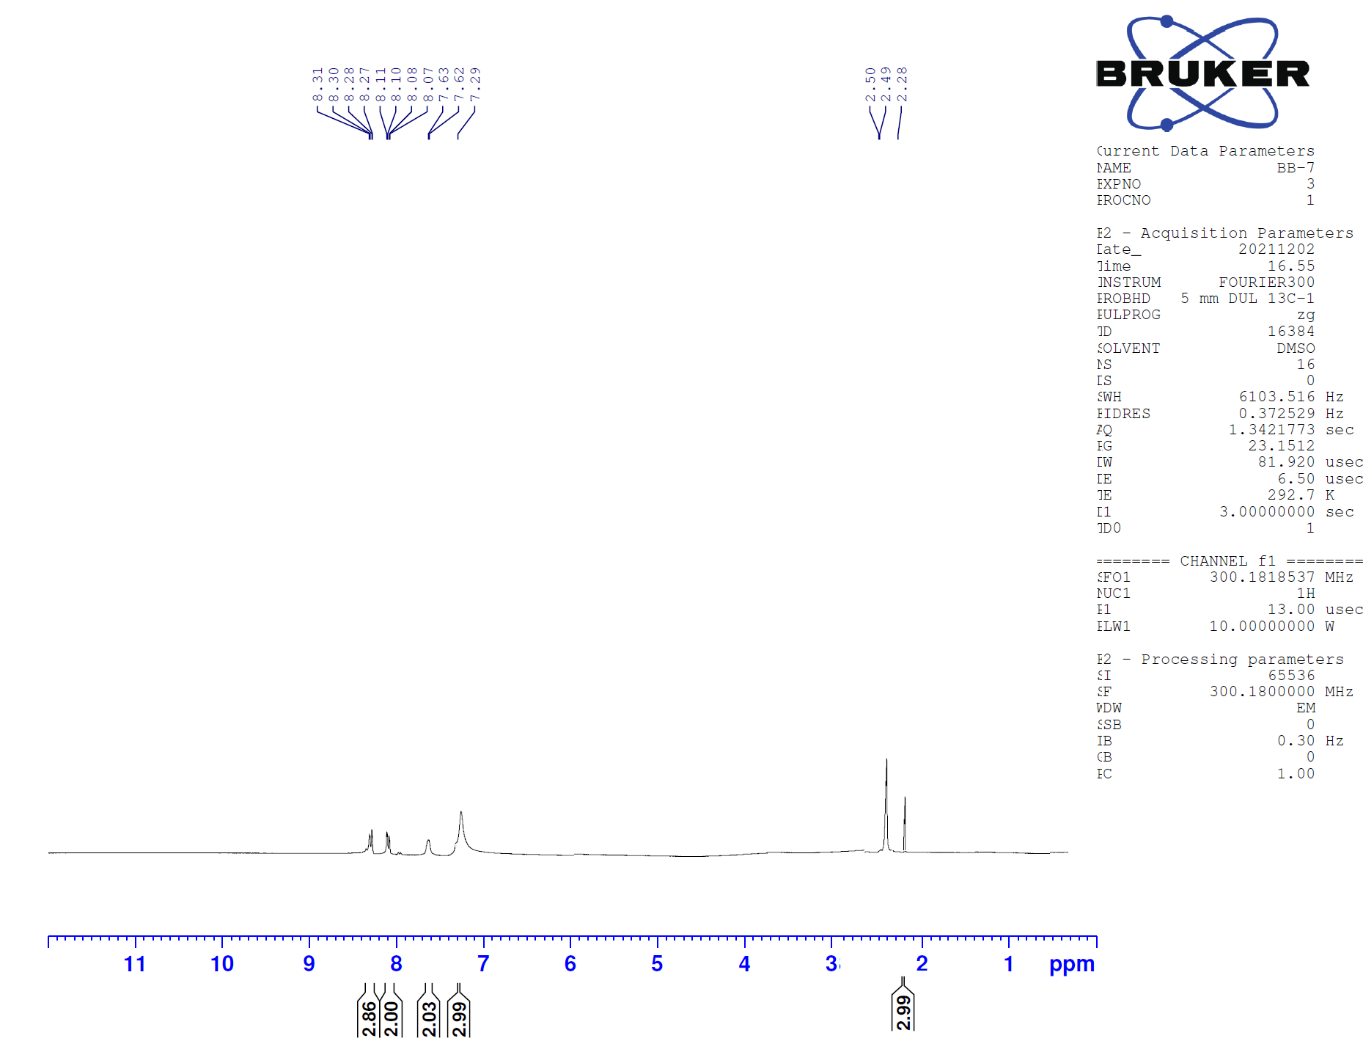


**Figure 19.** 1H-NMR spectrum of compound **4g**

**
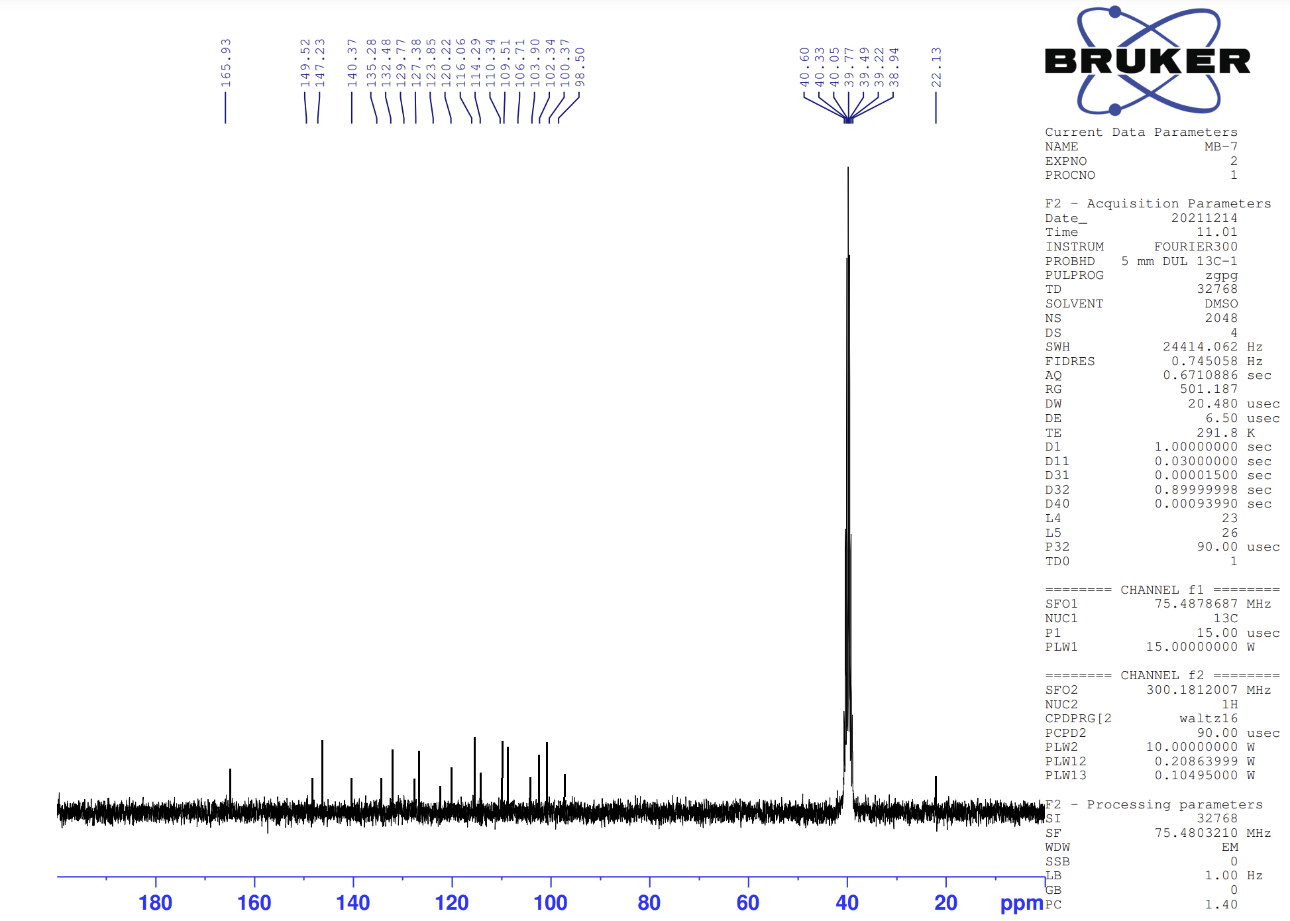
**

**Figure 20.** 13C-NMR spectrum of compound **4g**


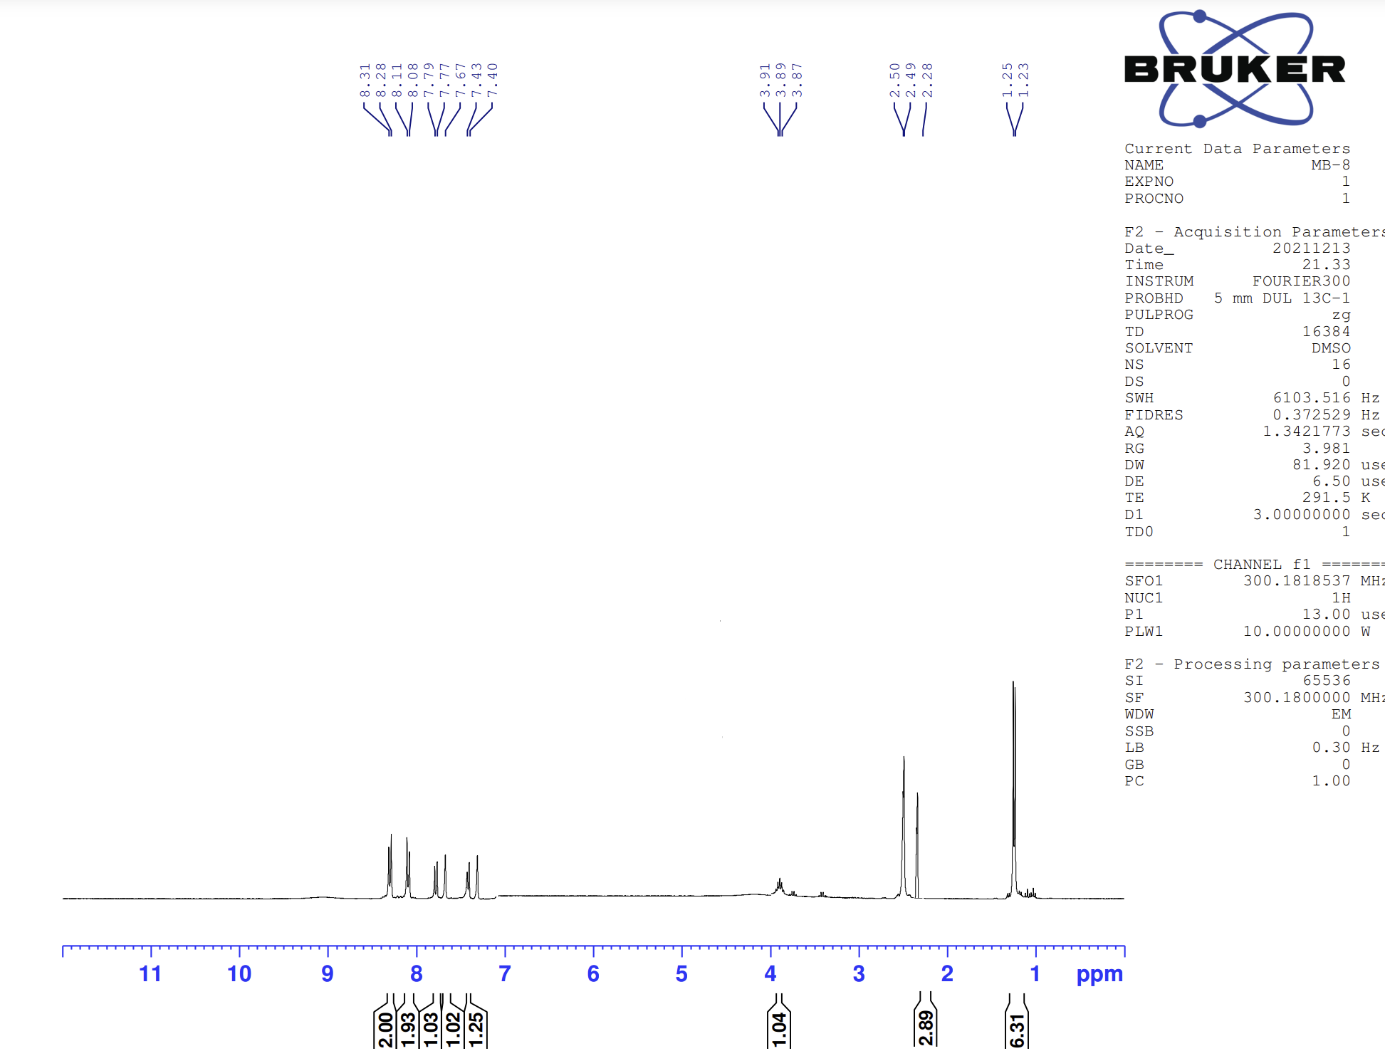


**Figure 22.** 1H-NMR spectrum of compound **4h**


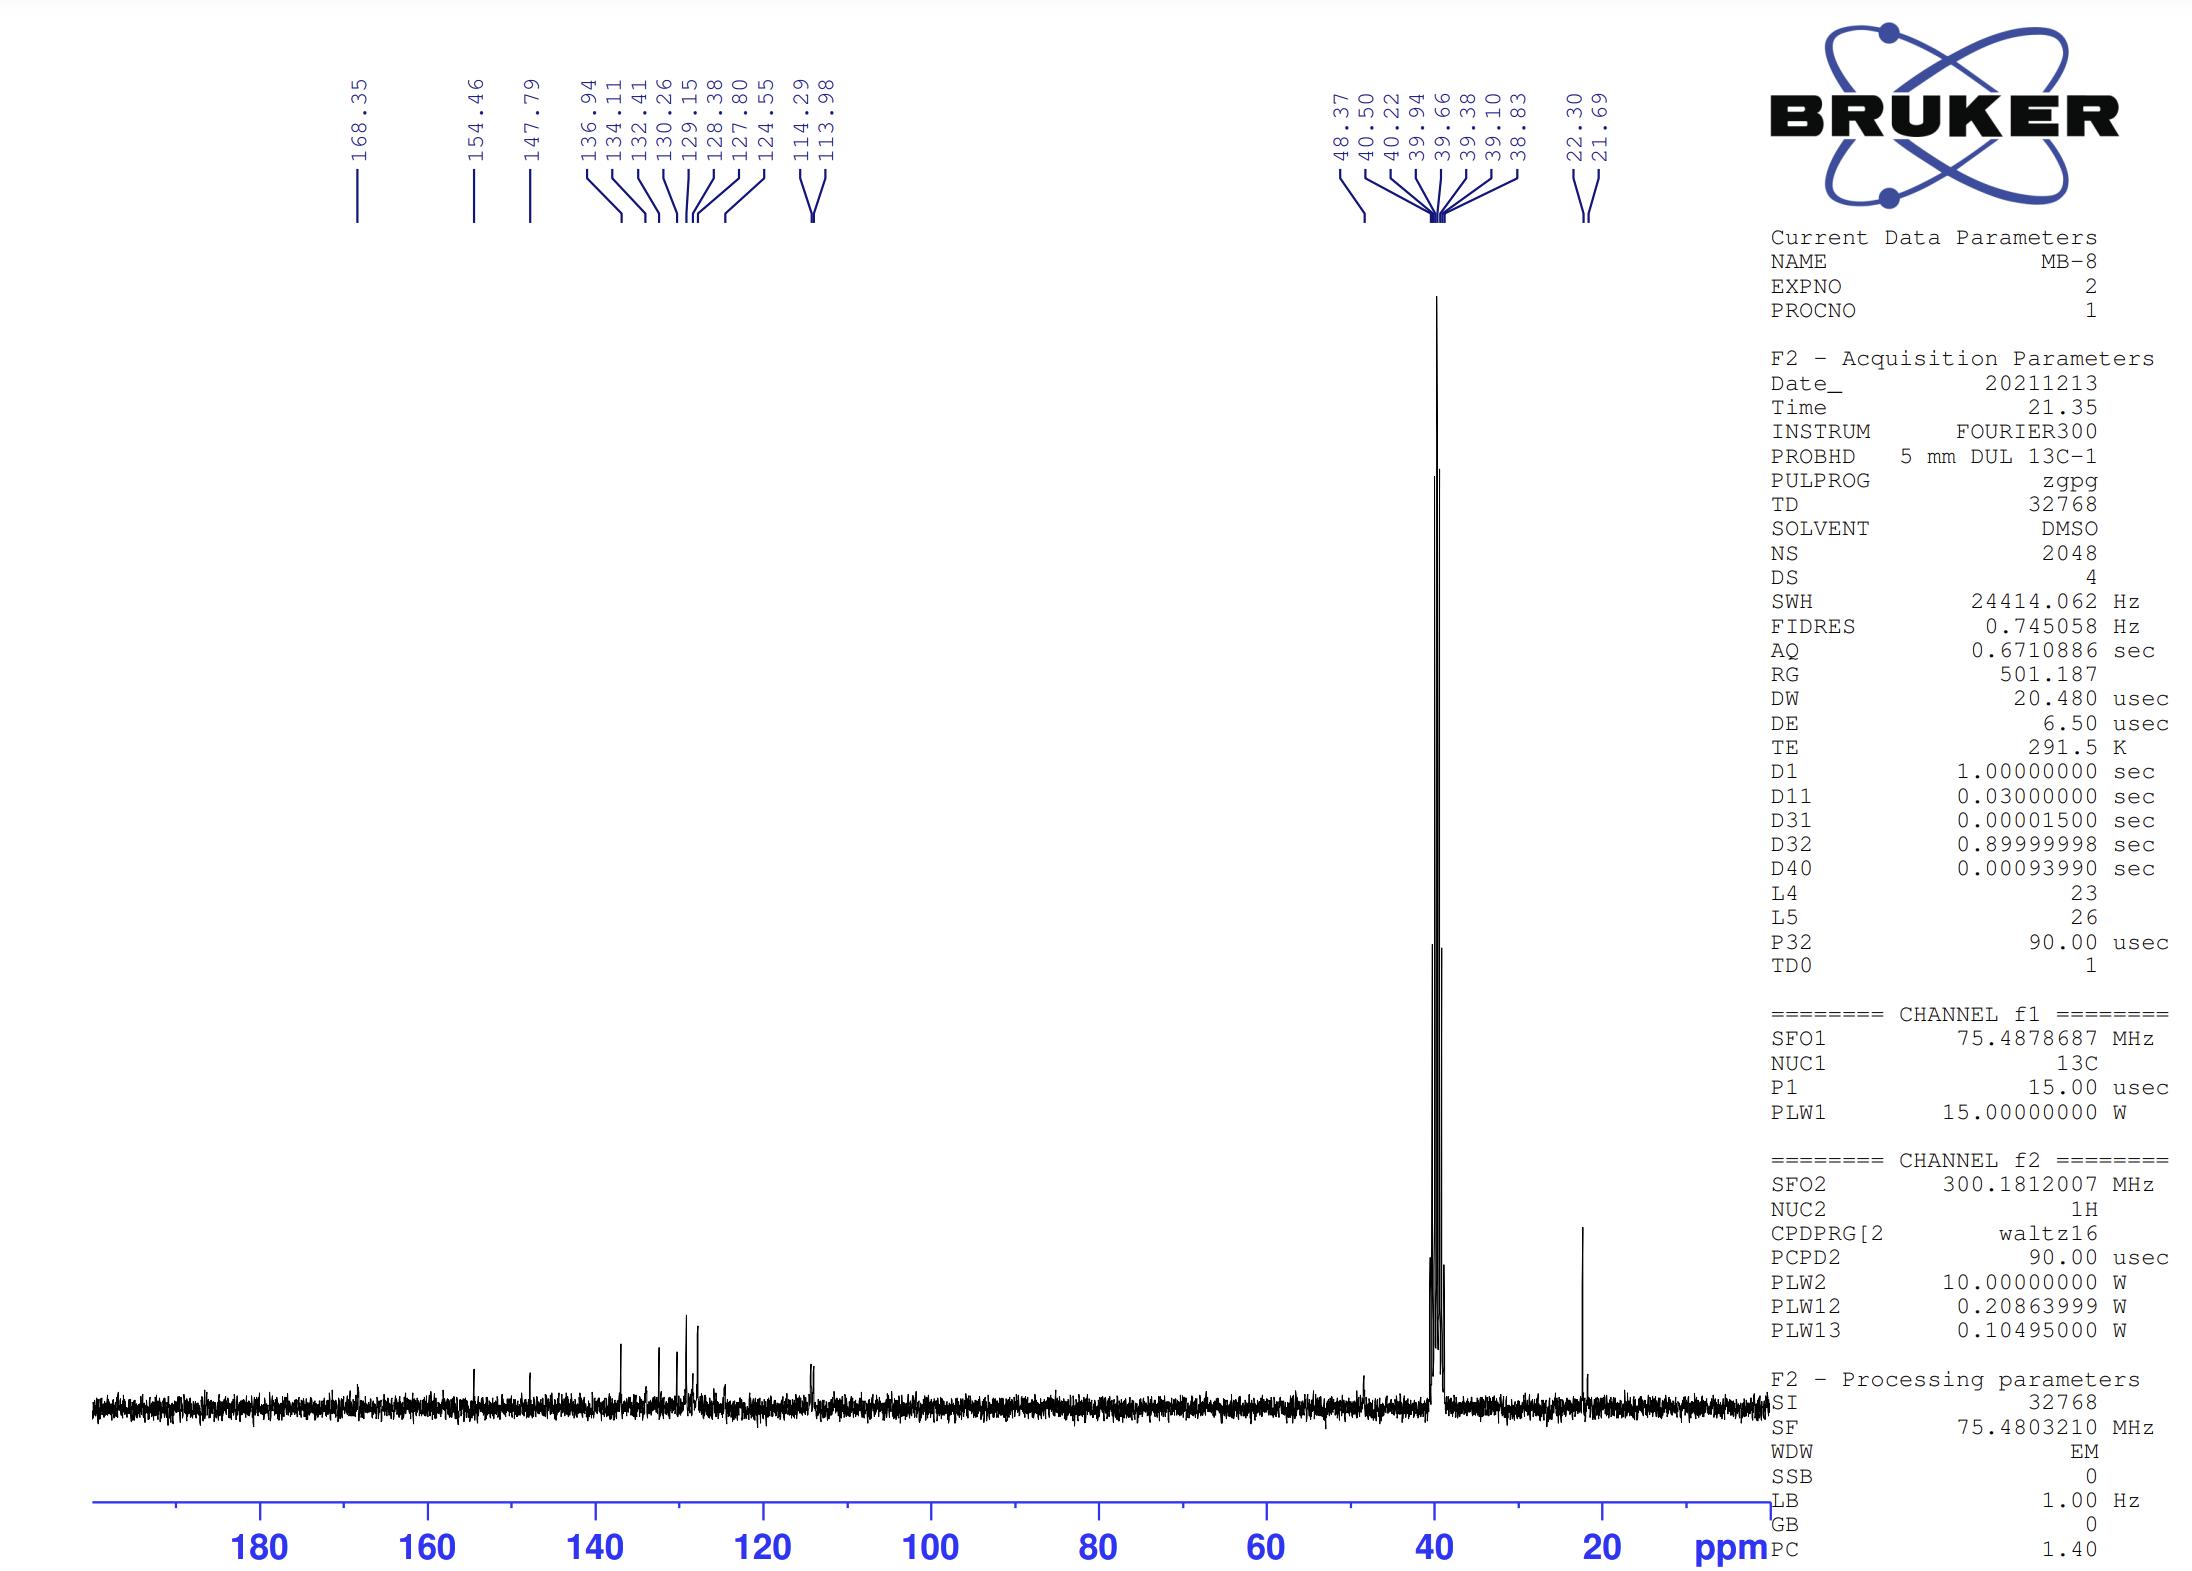


**Figure 23.** 13C-NMR spectrum of compound **4h**


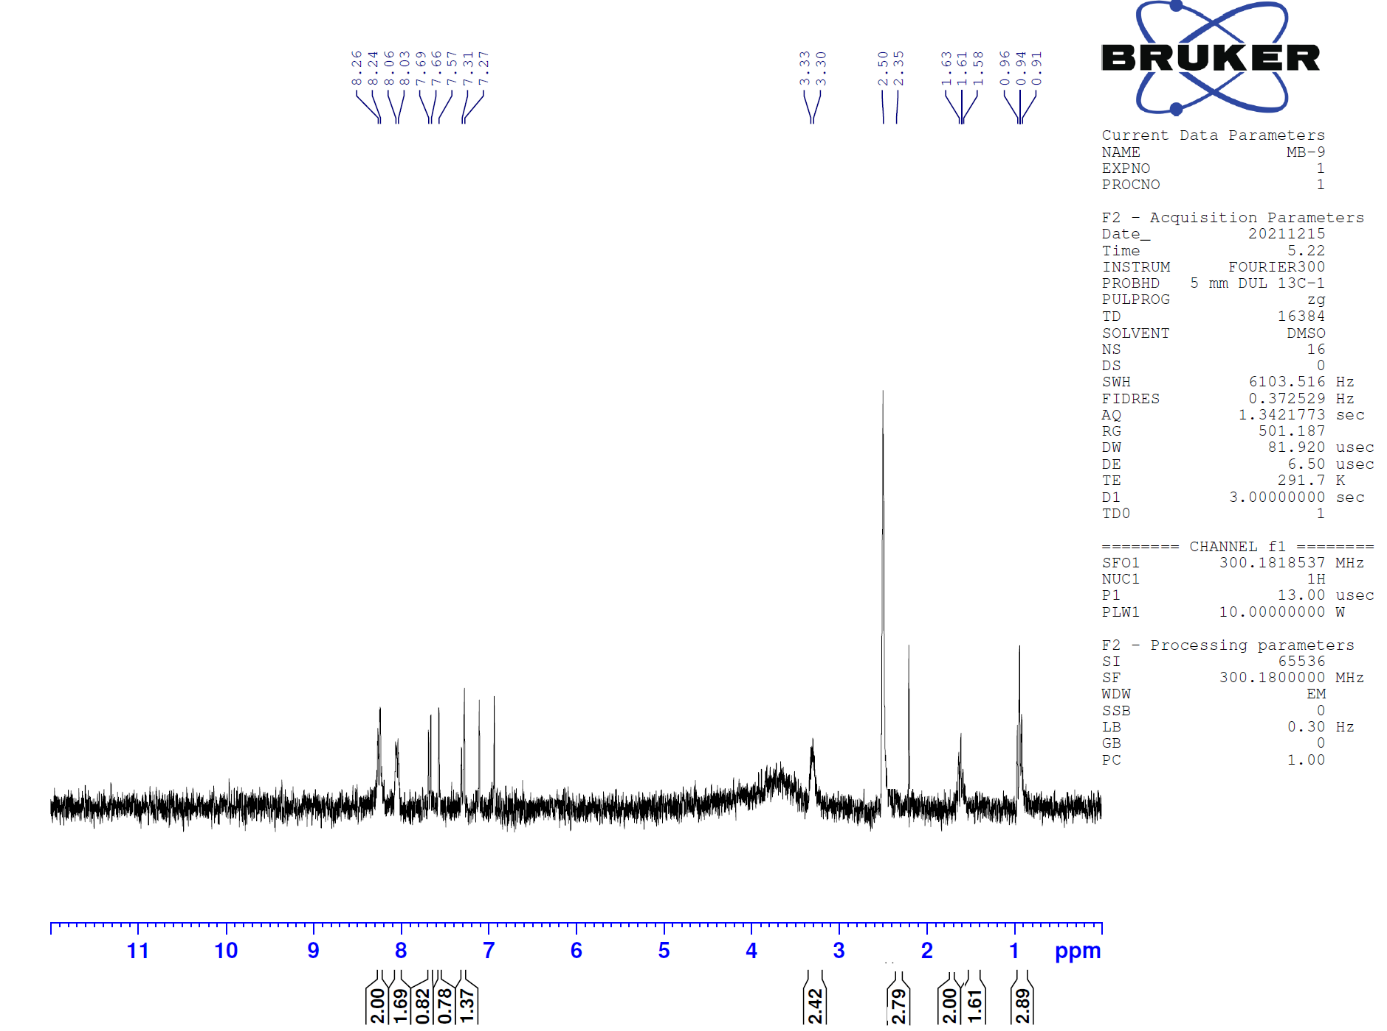


**Figure 25.** 1H-NMR spectrum of compound **4i**

**
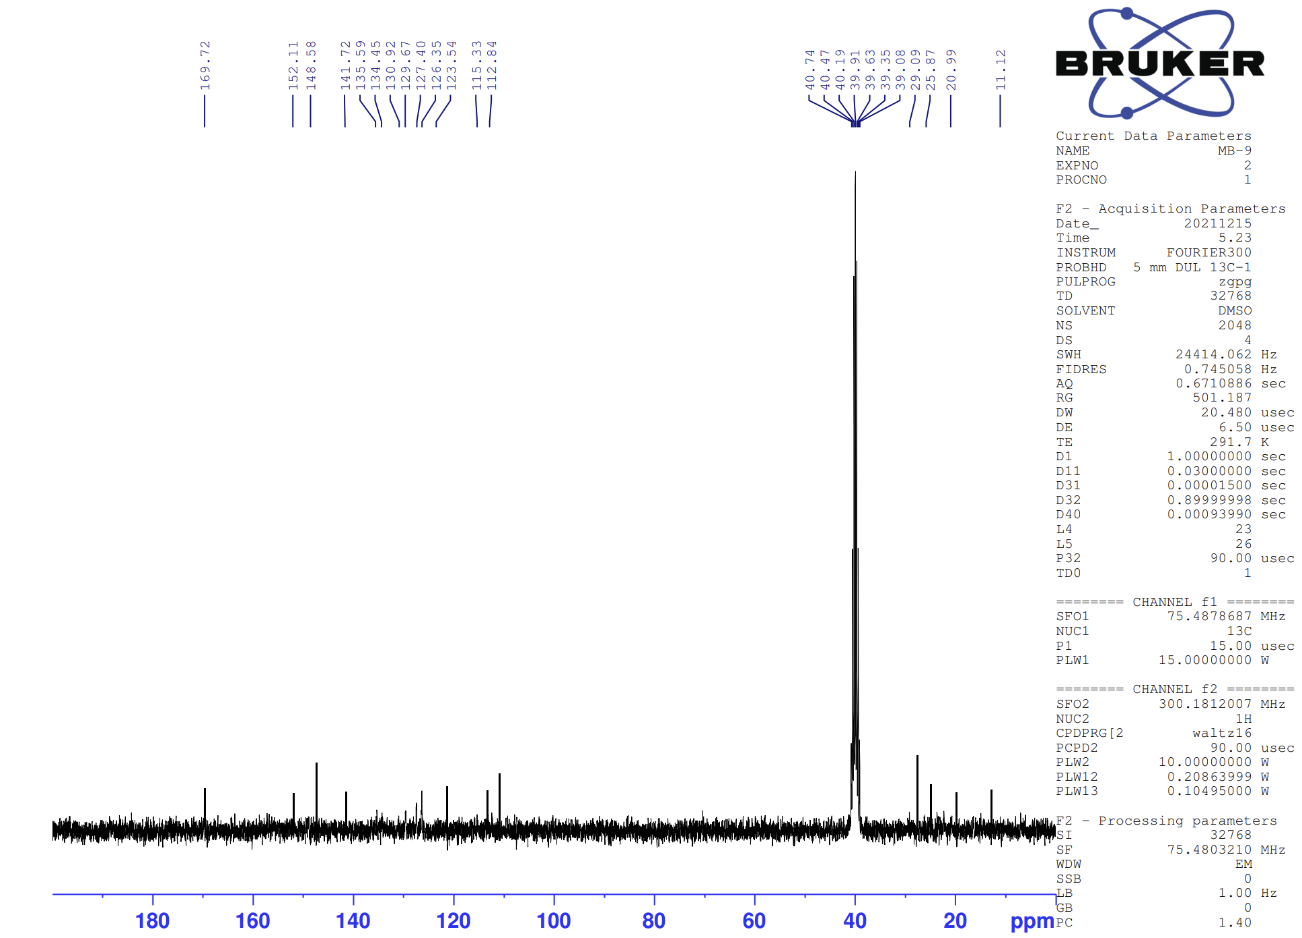
**

**Figure 26.** 13C-NMR spectrum of compound **4i**


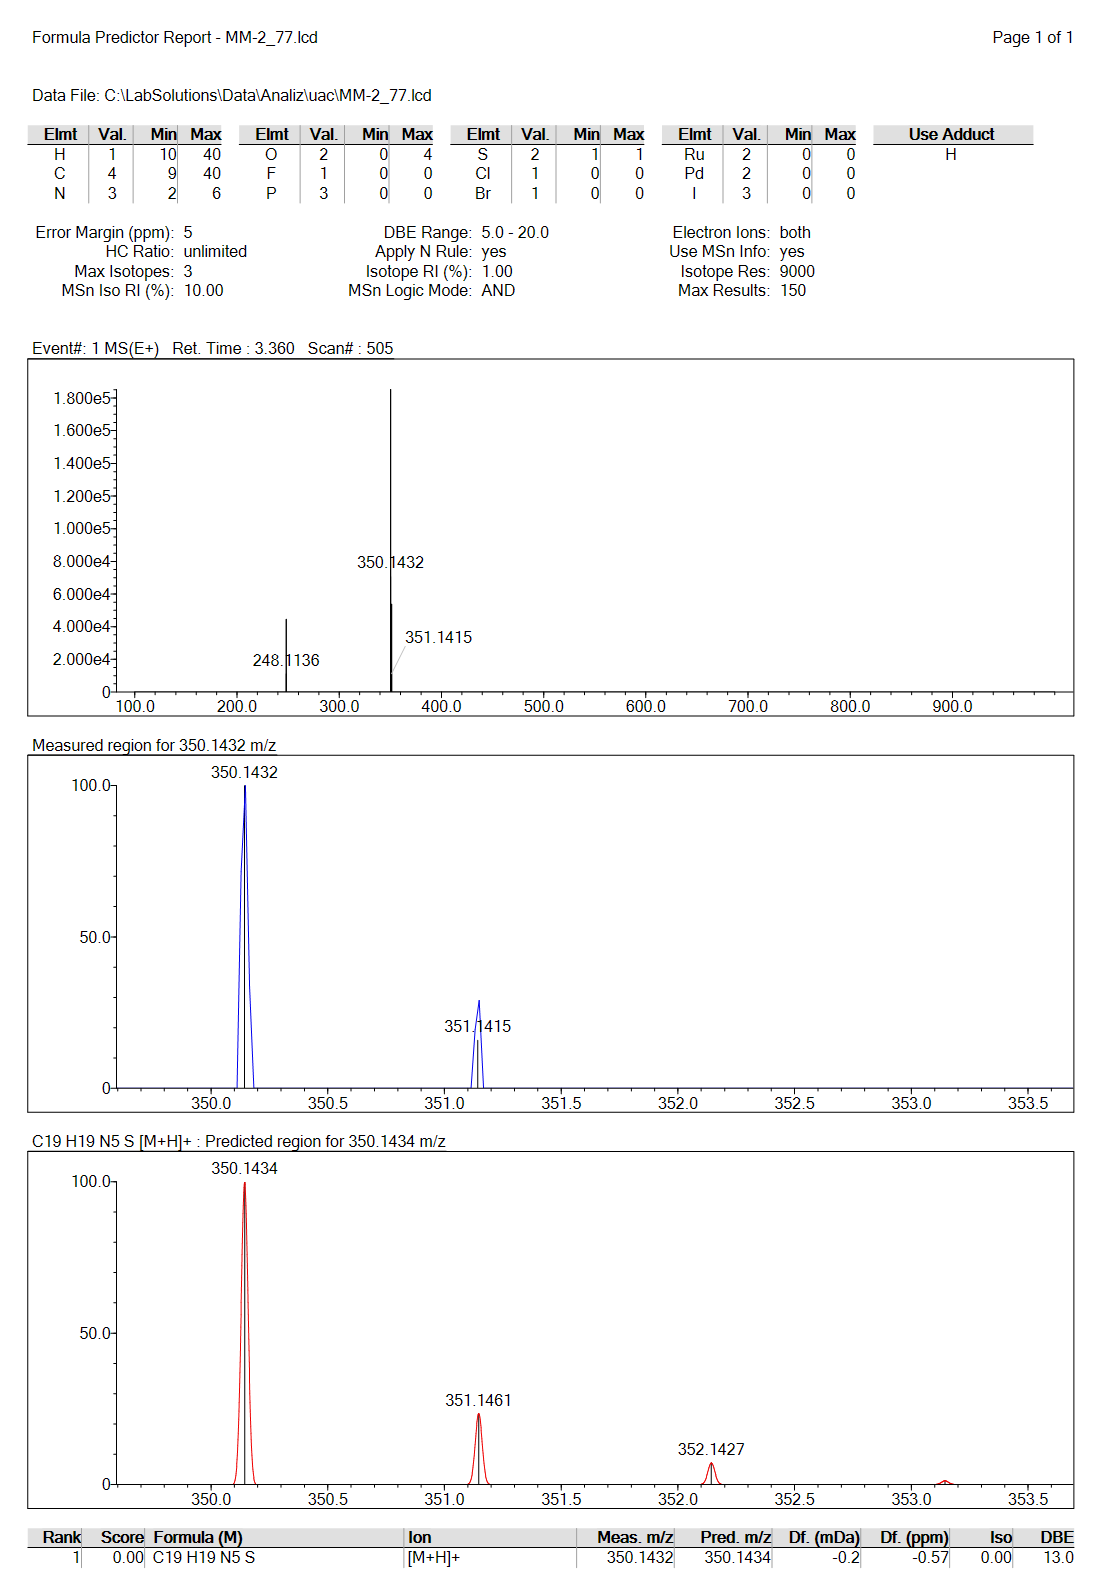


**Figure 27.** Mass spectrum of compound **4i**


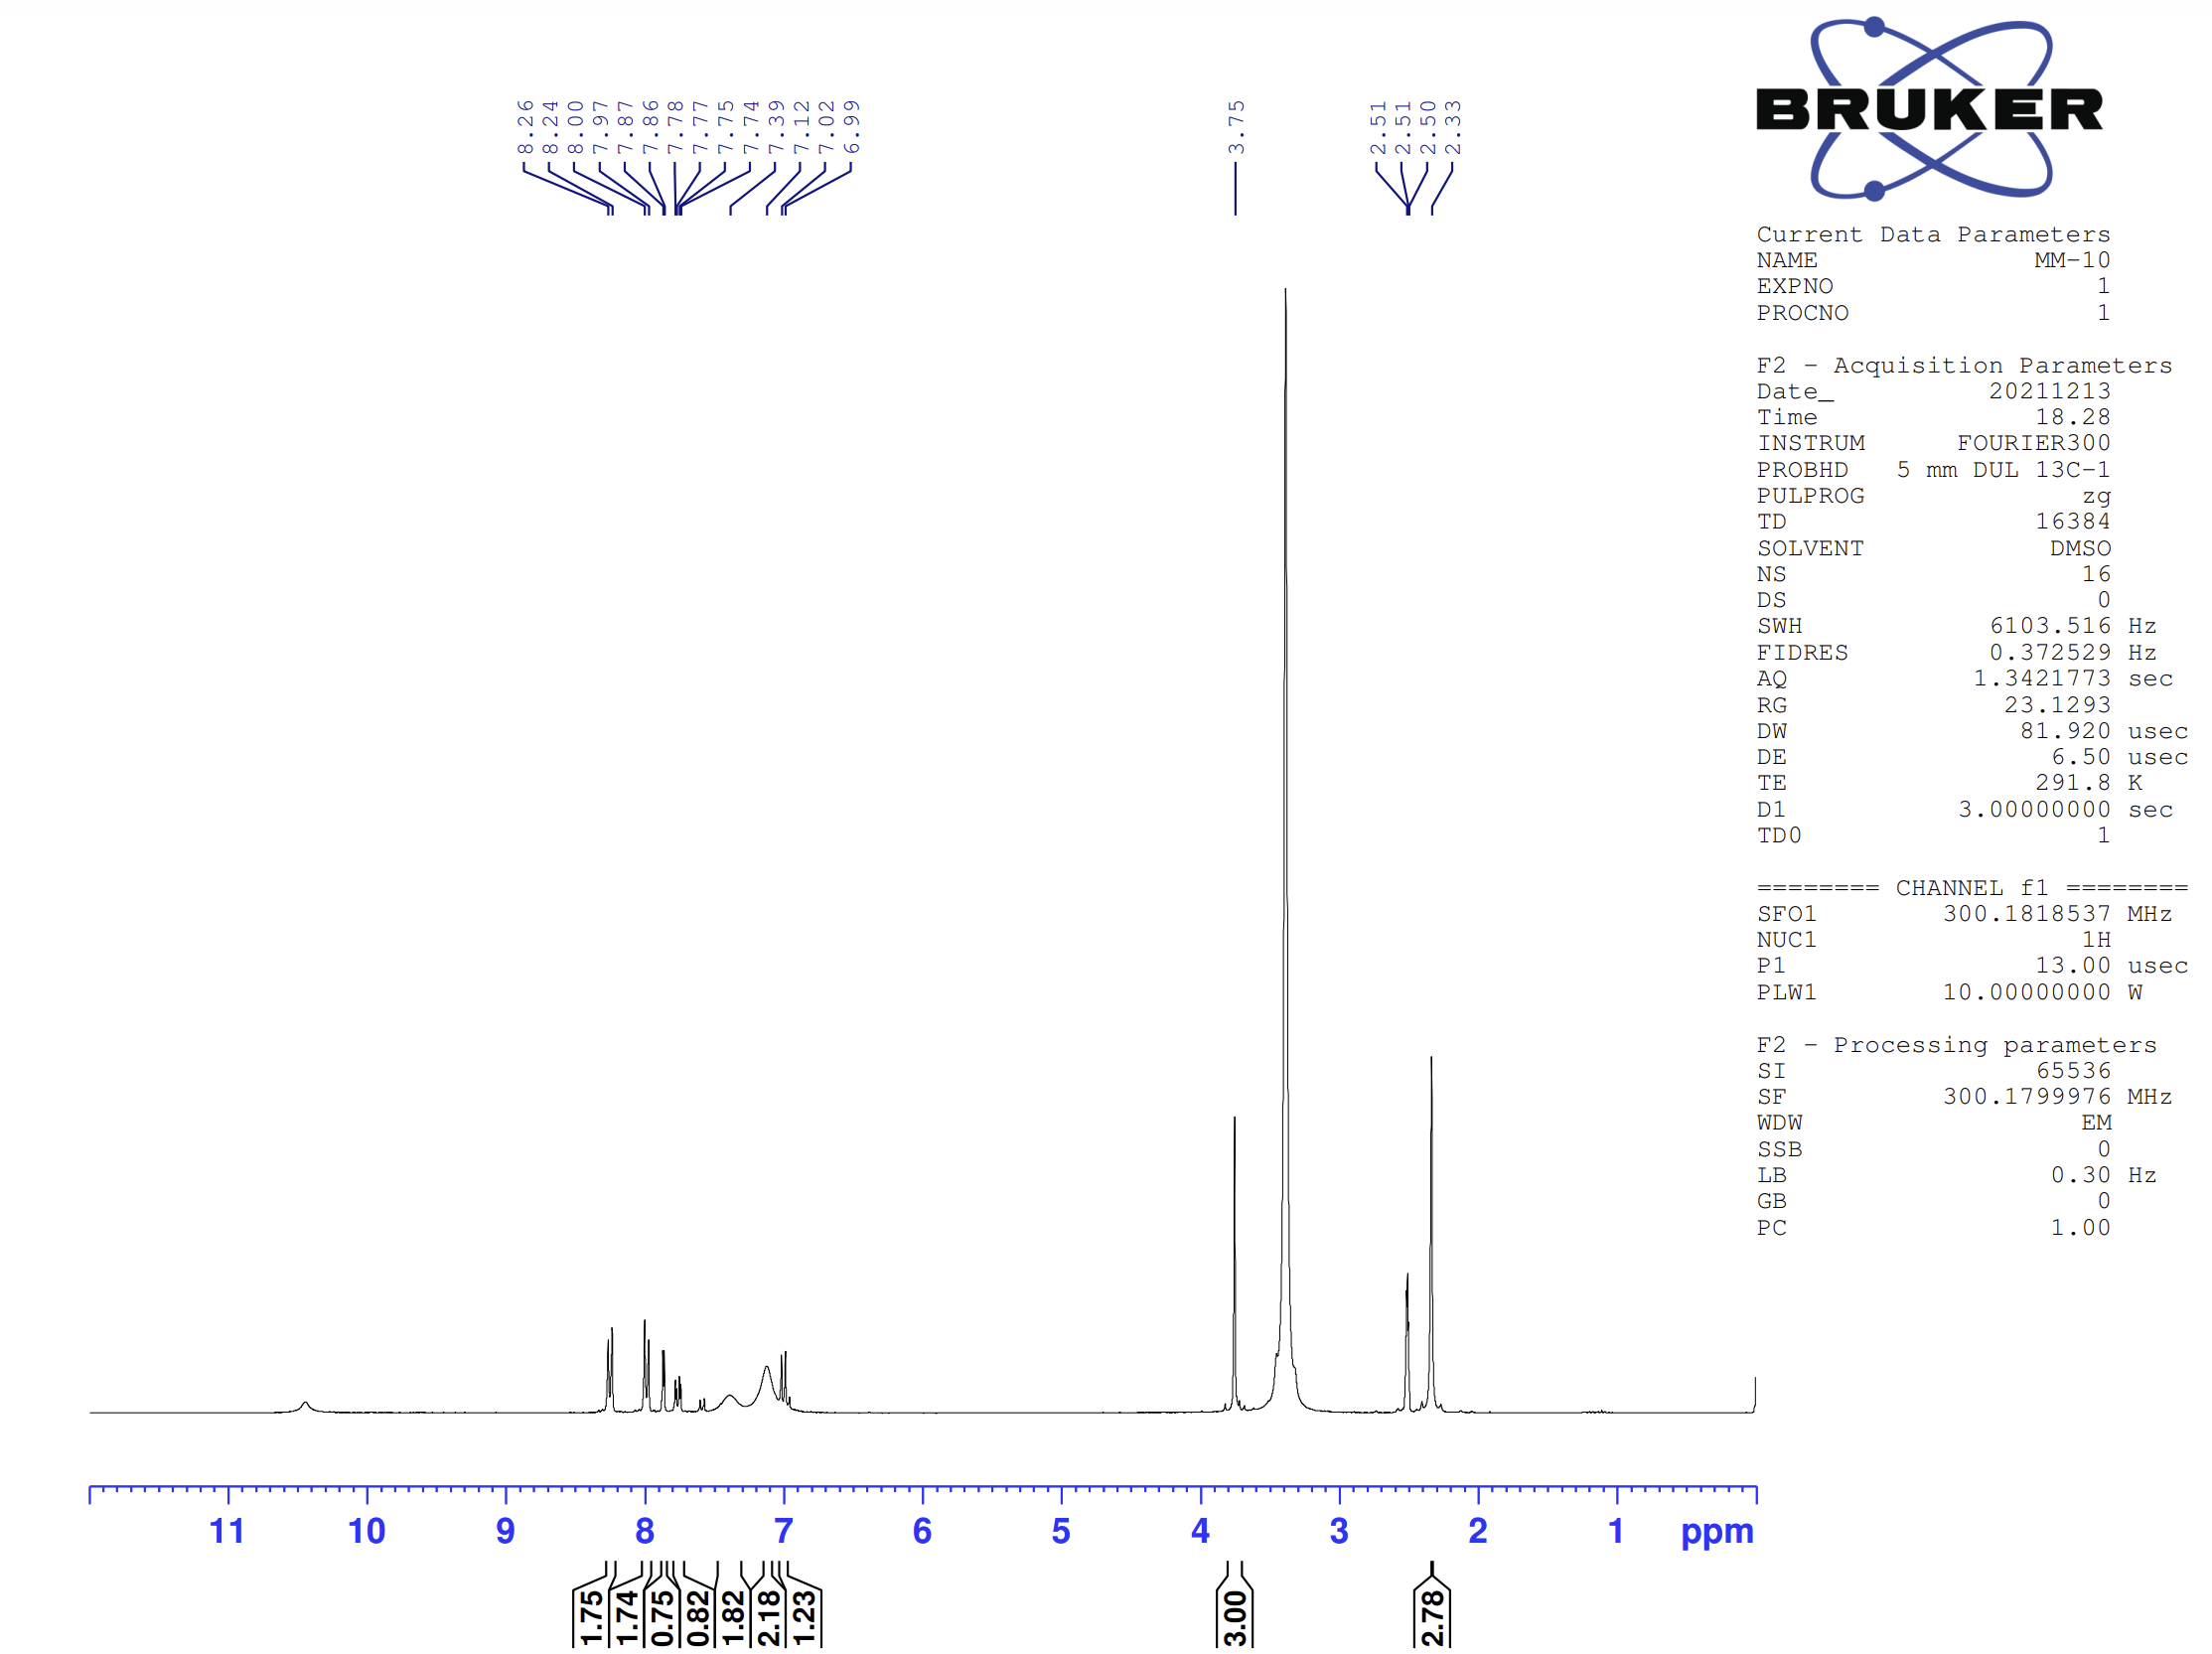


**Figure 28.** 1H-NMR spectrum of compound **4j**


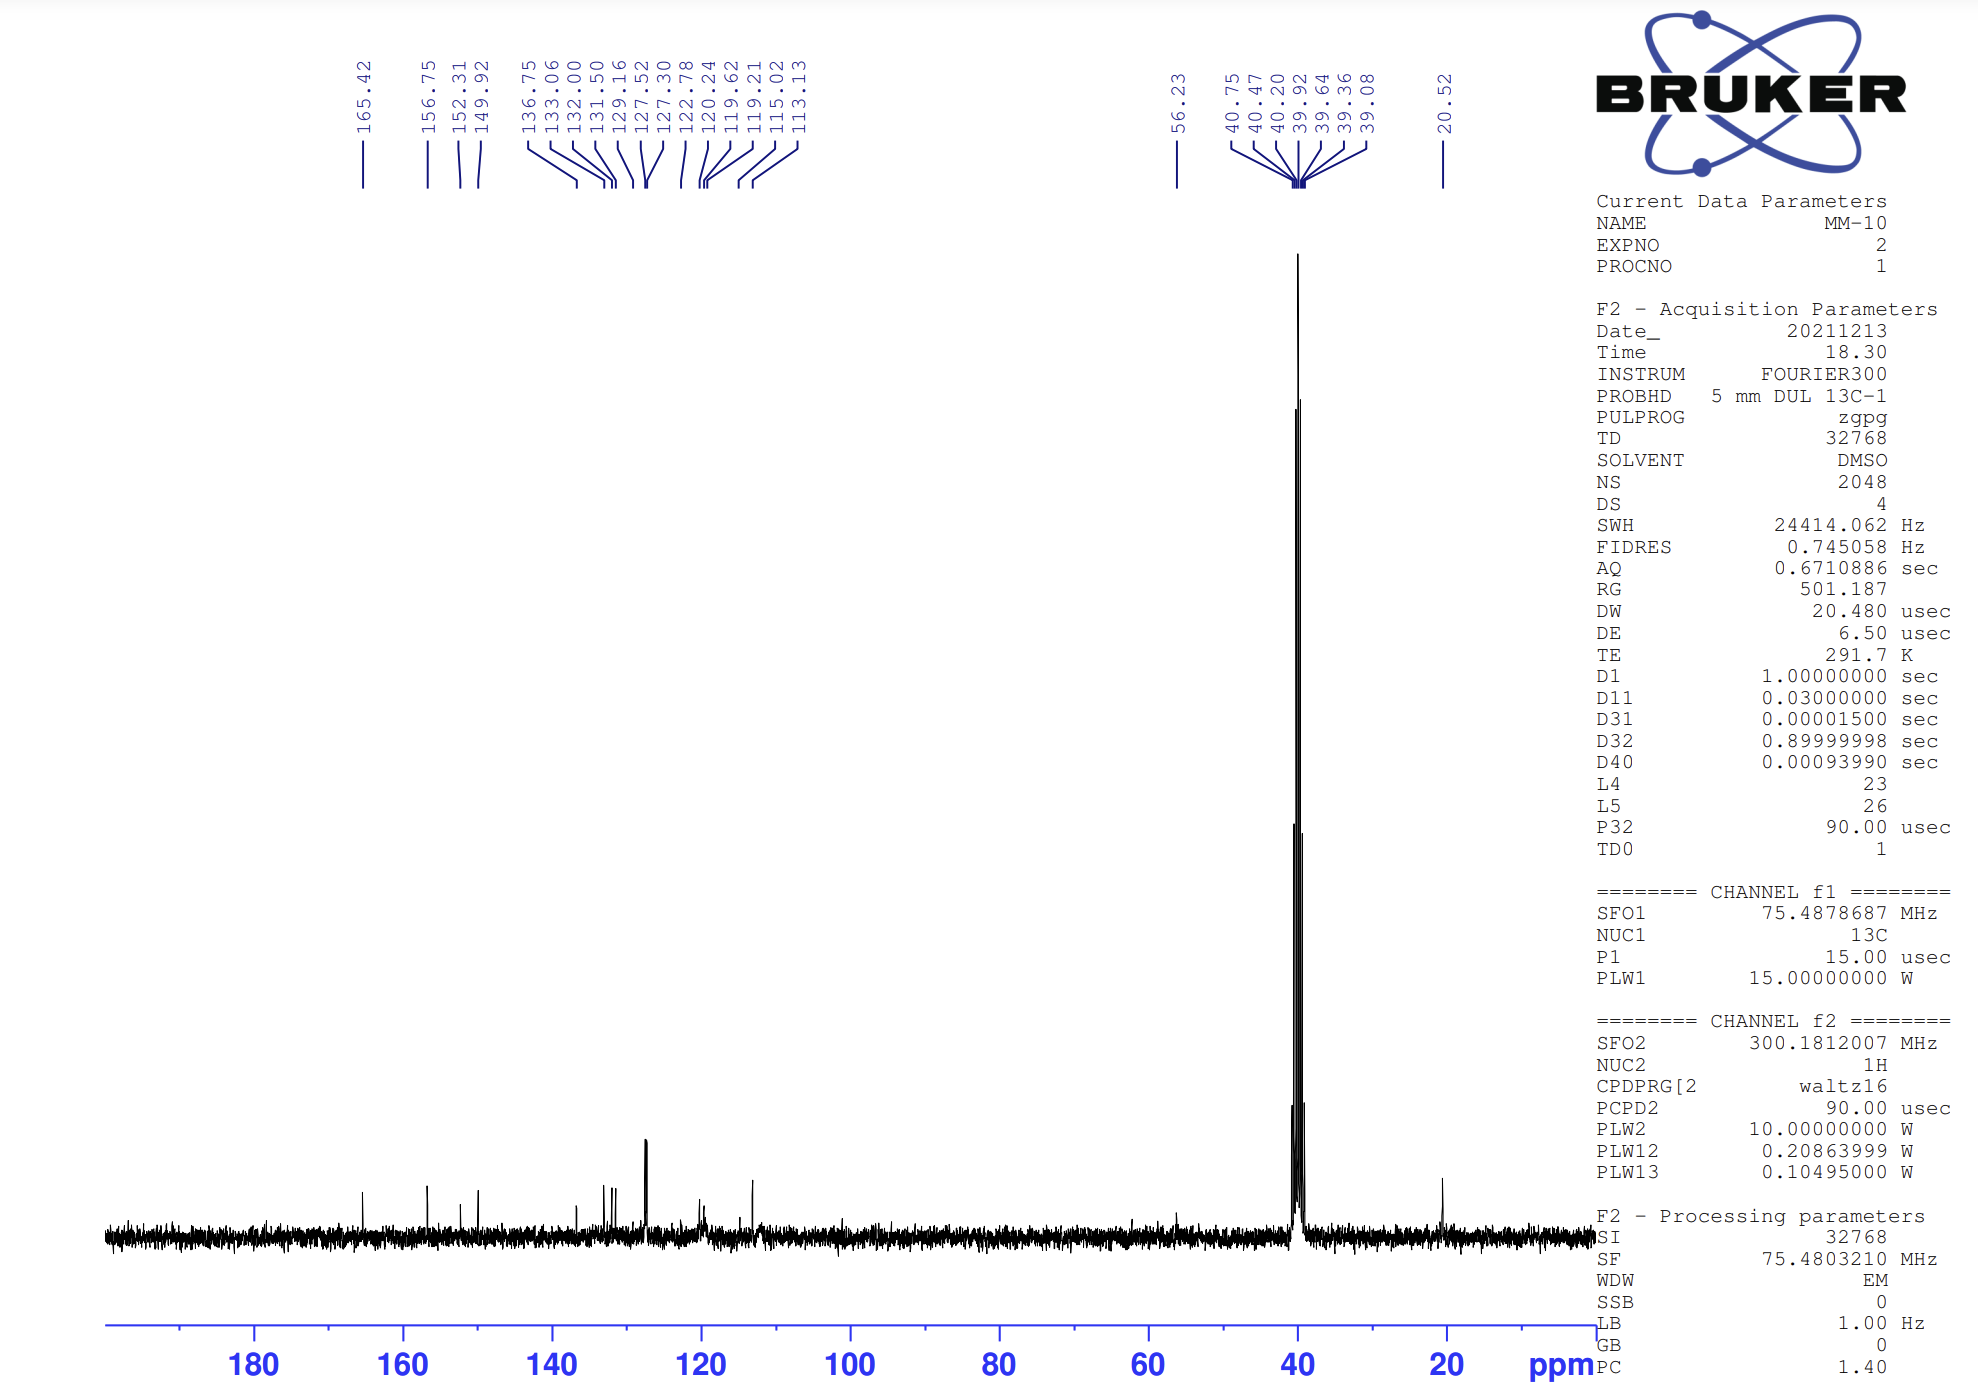


**Figure 29.** 13C-NMR spectrum of compound **4j**


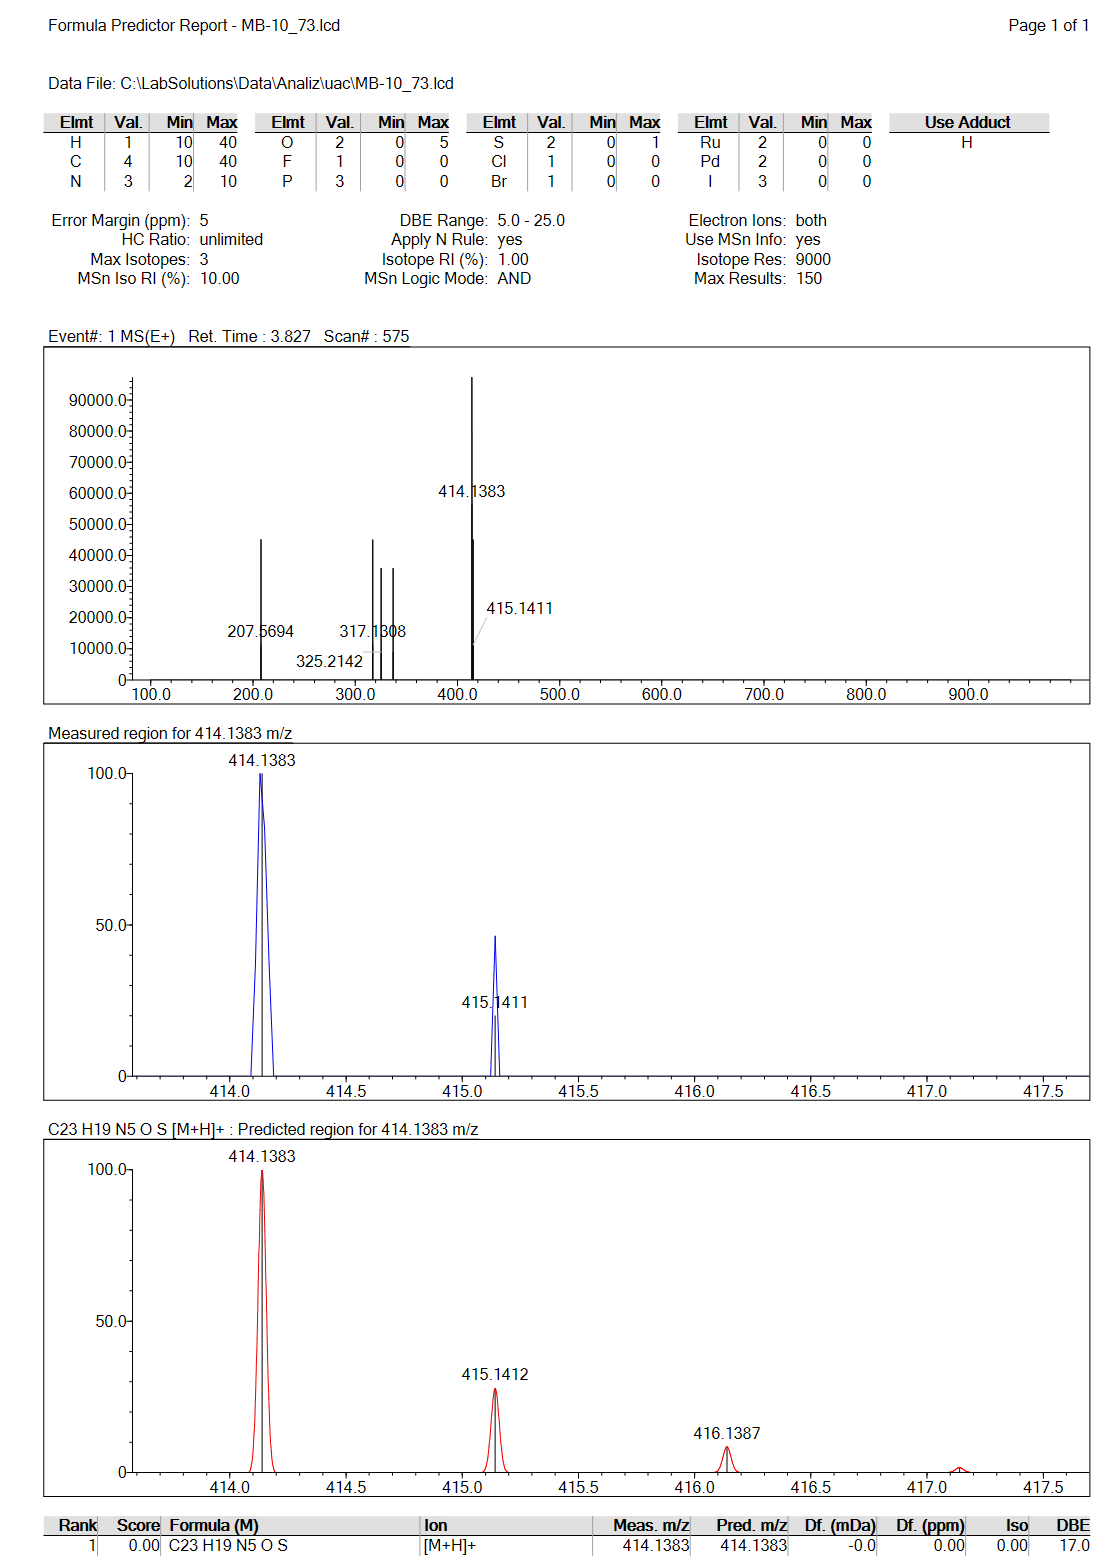


**Figure 30.** Mass spectrum of compound **4j**


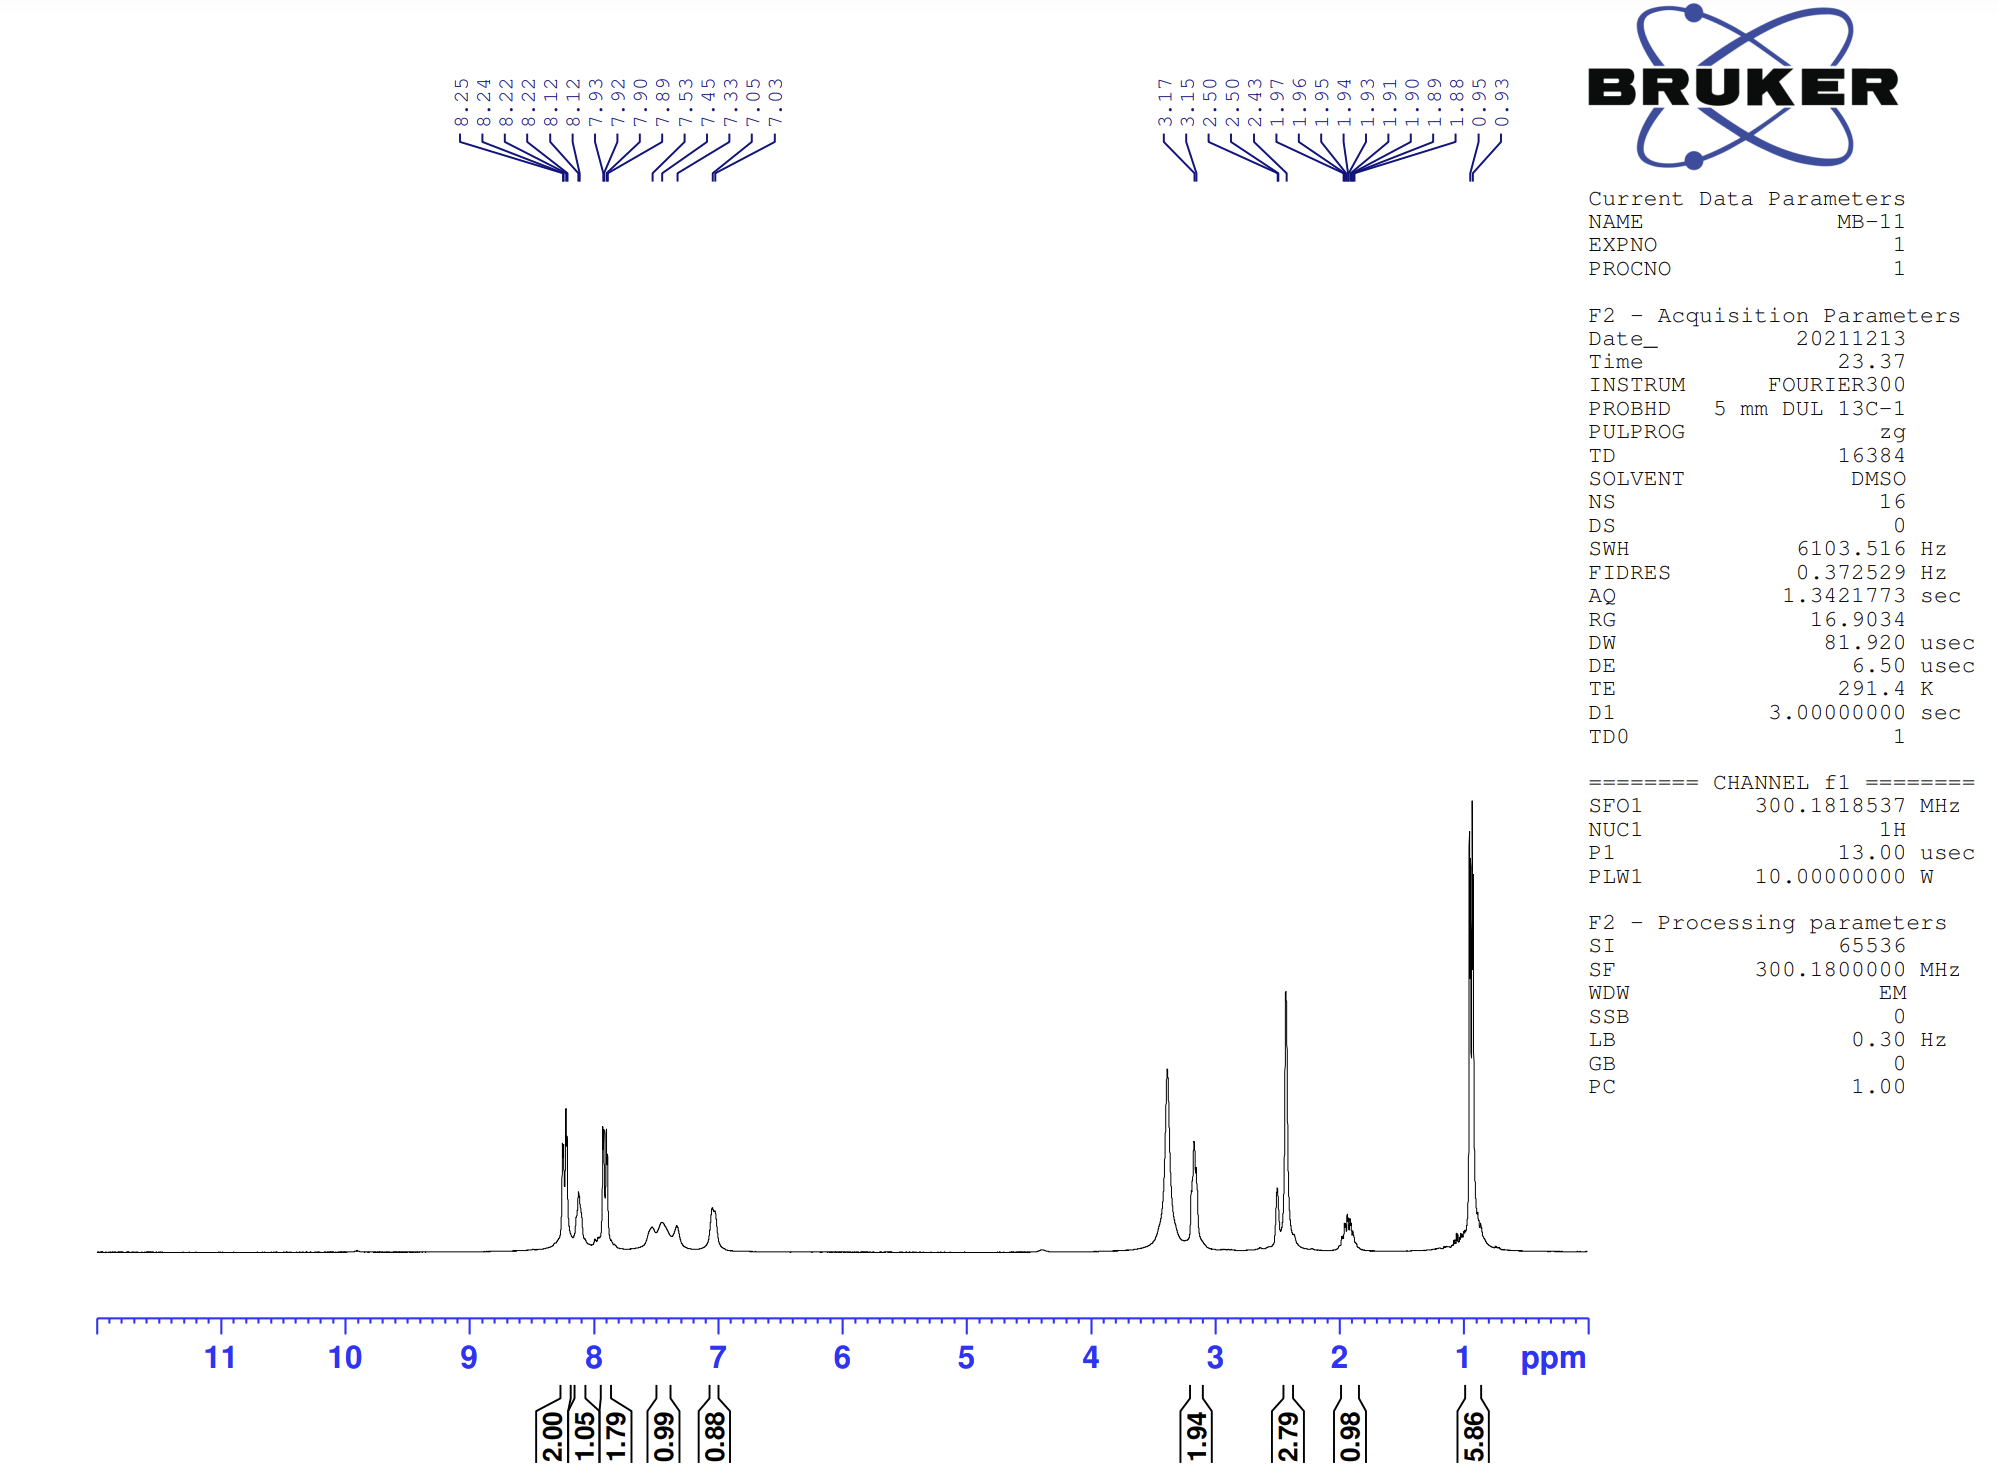
**Figure 31.** 1H-NMR spectrum of compound **4k**


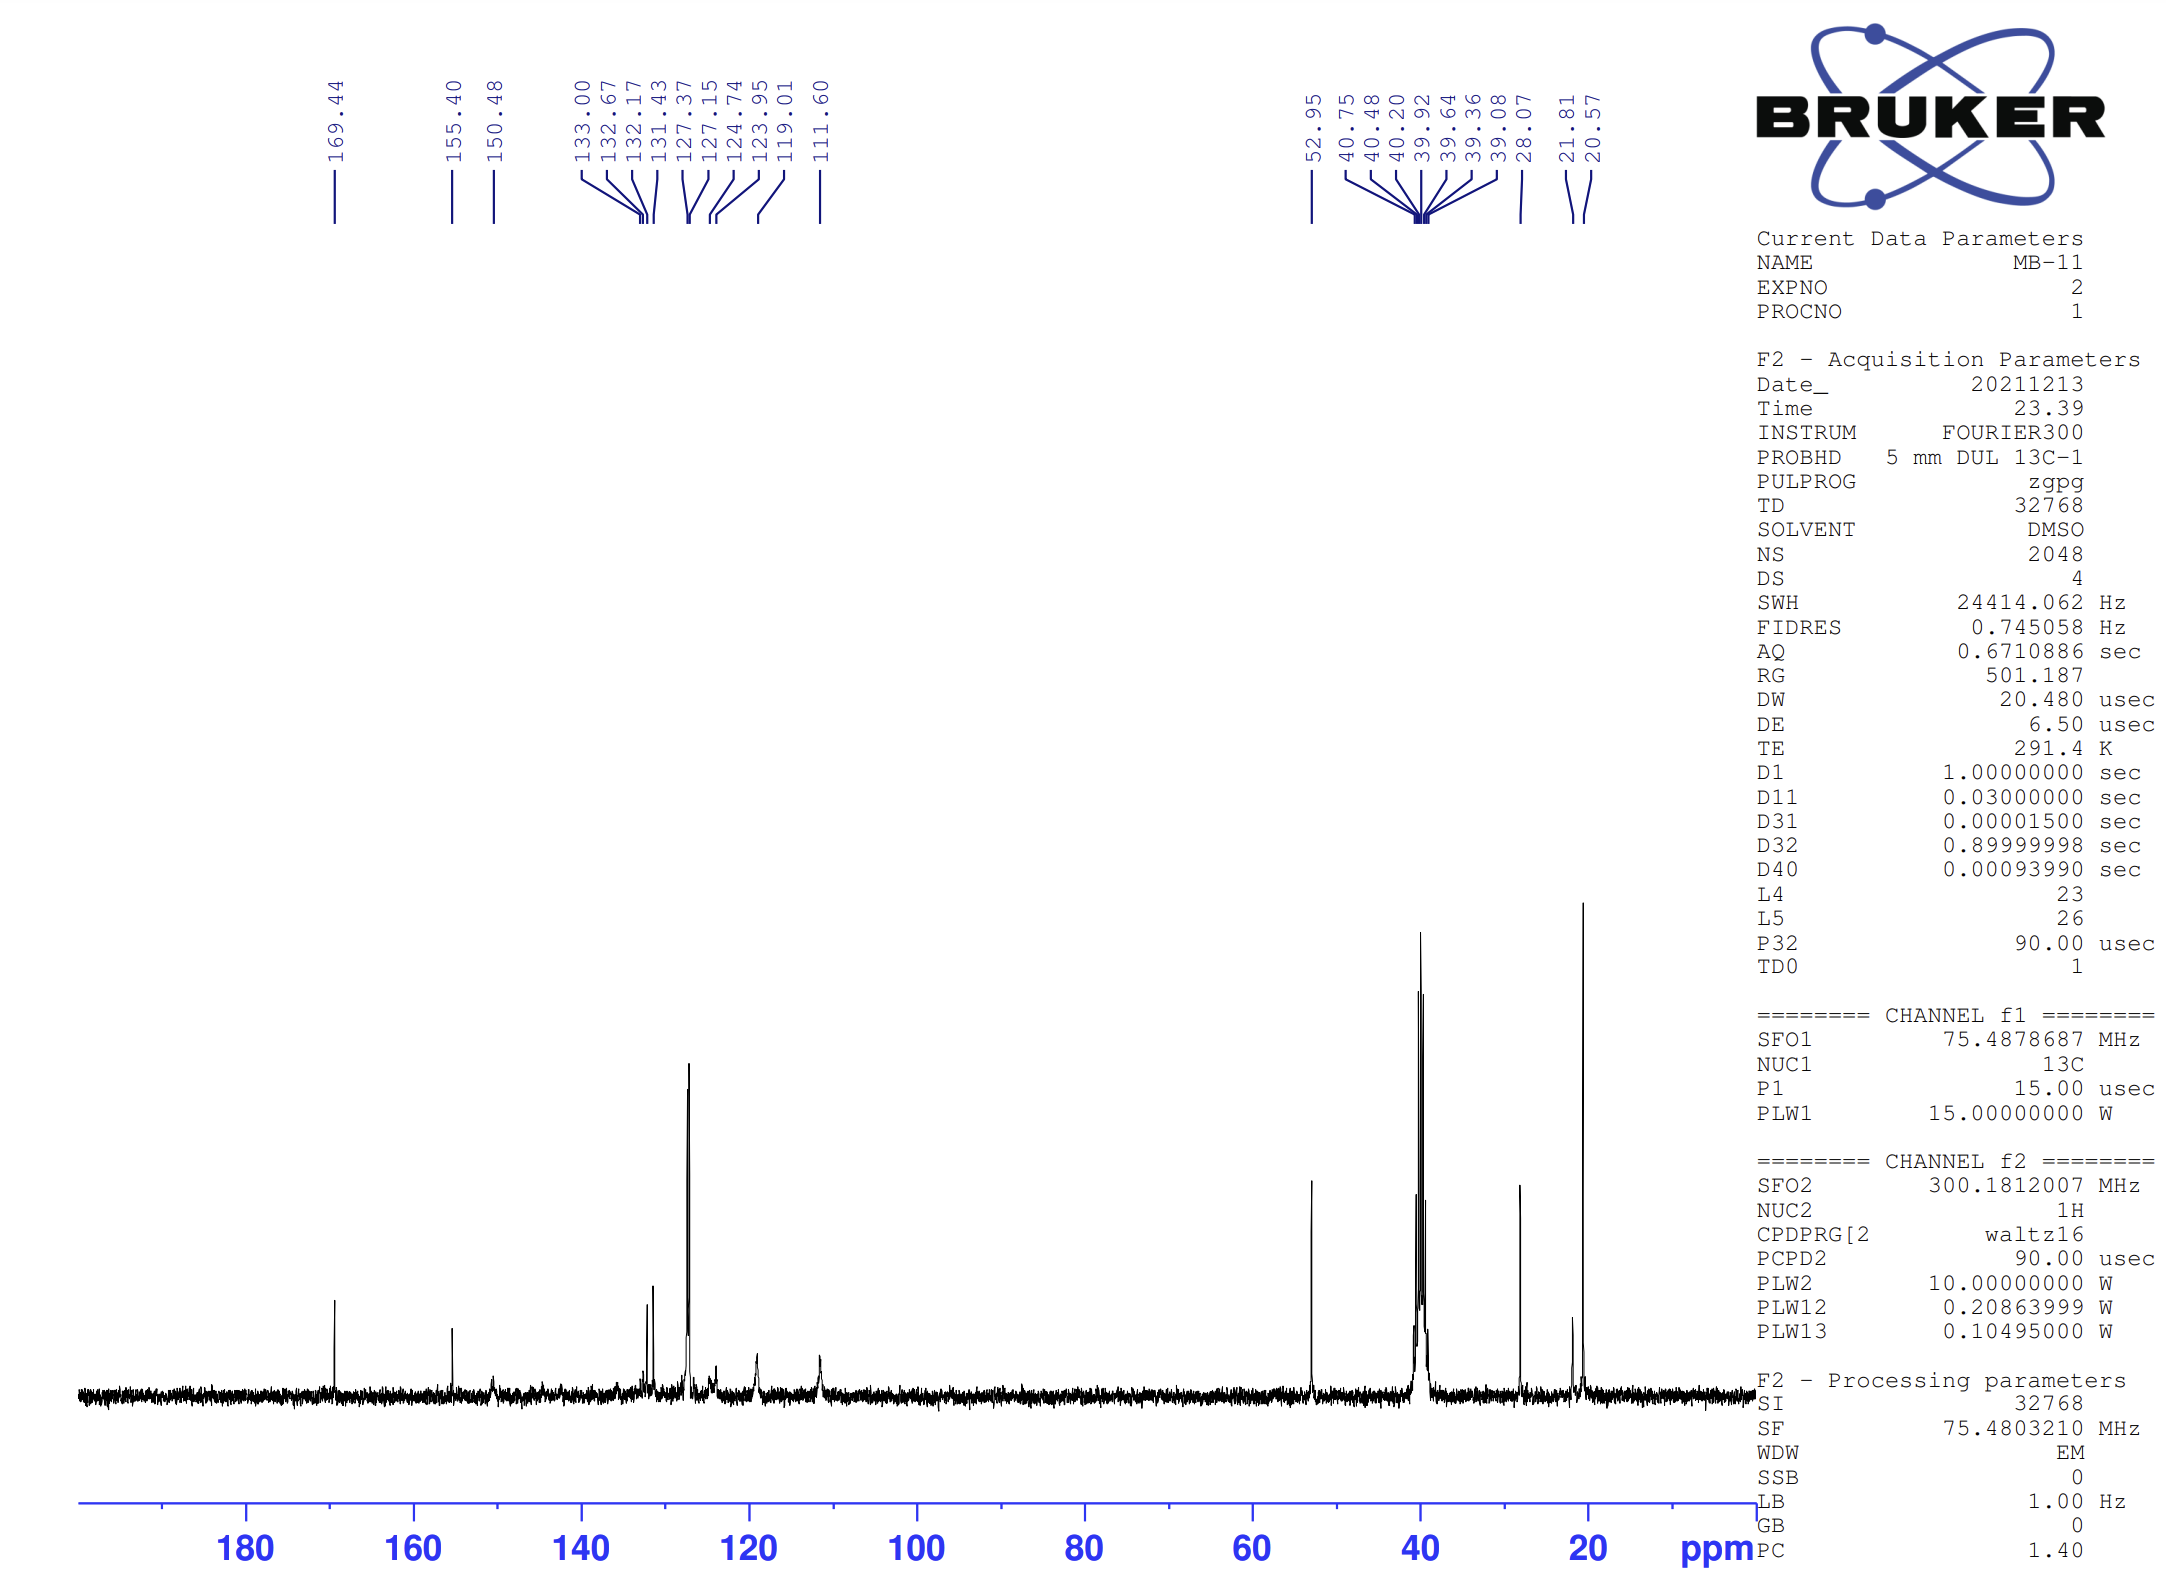


**Figure 32.** 13C-NMR spectrum of compound **4k**


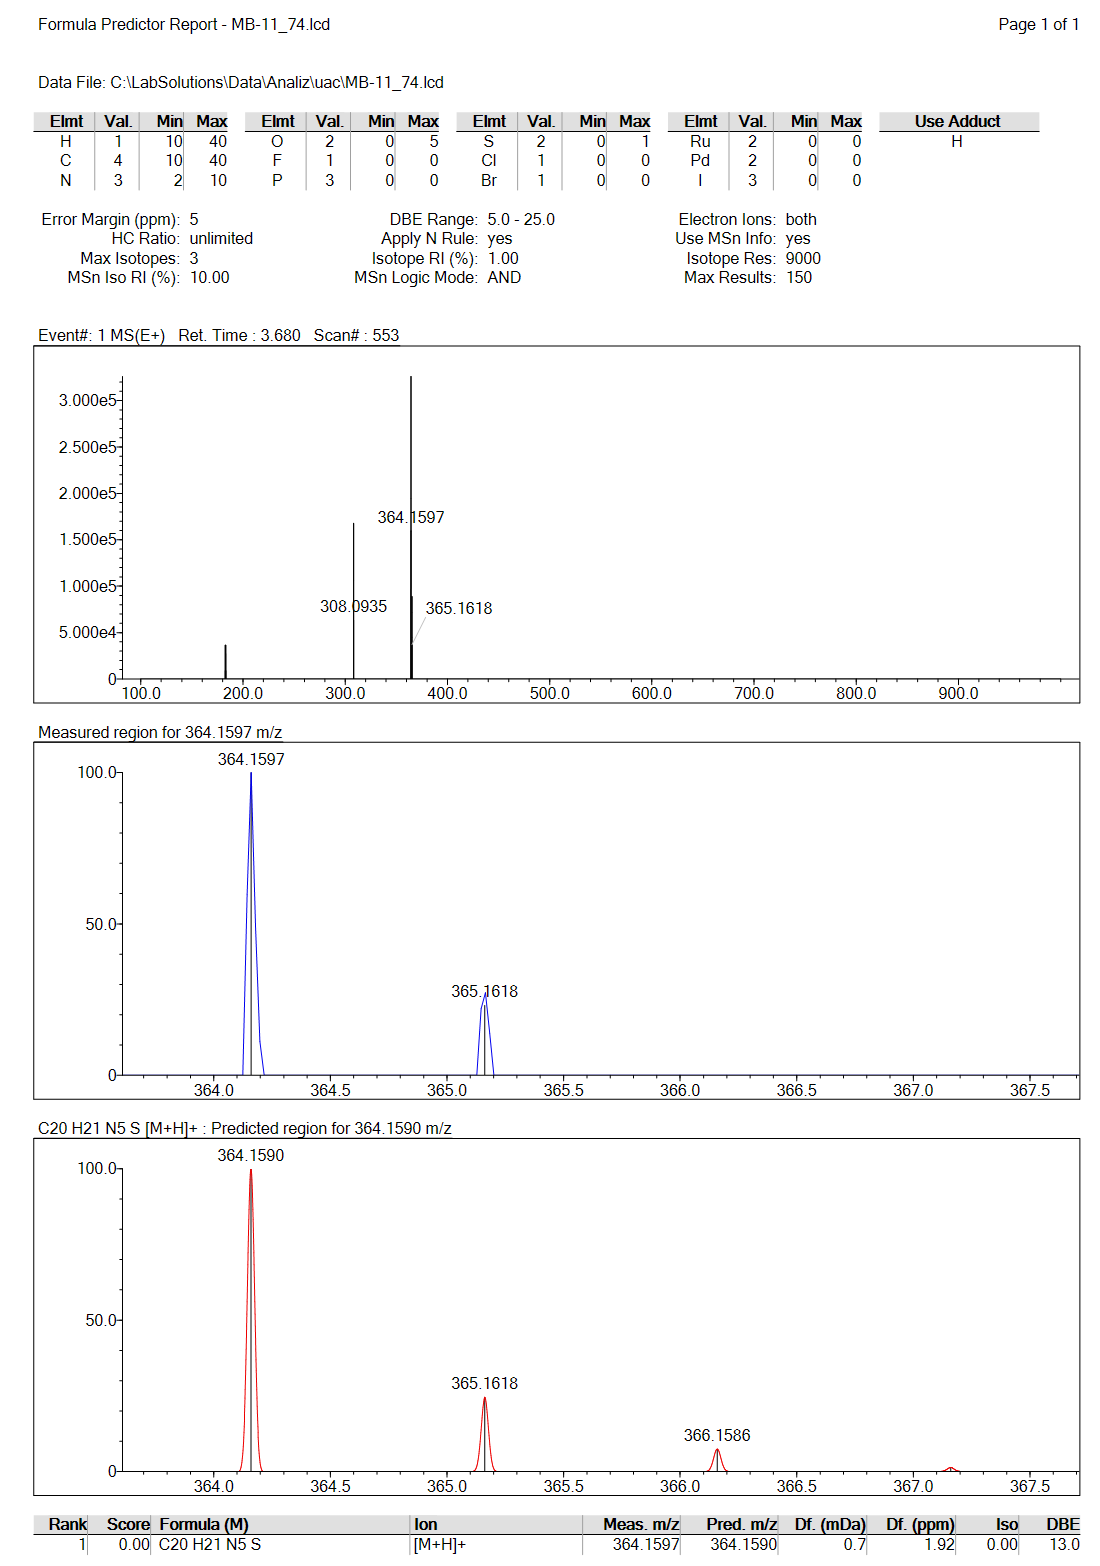


**Figure 33.** Mass spectrum of compound **4k**
